# Supplementary material for: Association Between Obstructive Sleep Apnea and Brain White Matter Hyperintensities in a Population-Based Cohort in Germany
Source: PubMed Central journal article supplement (PMC8493431; doi:10.1001/jamanetworkopen.2021.28225), 2021-10-05
Supplement: jamanetwopen-e2128225-s001.pdf [file jamanetwopen-e2128225-s001.pdf]

## Supplementary Online Content

Zacharias HU, Weihs A, Habes M, et al. Association between obstructive sleep apnea and brain white matter hyperintensities in a population-based cohort in Germany. *JAMA Netw Open*. 2021;4(10):e2128225. doi:10.1001/jamanetworkopen.2021.28225

**eMaterials and Methods.** Detailed Information About Data Assessment in SHIP-Trend-0, Magnetic Resonance Imaging Acquisition Parameters, and Categorization of Obstructive Sleep Apnea Parameters

**eFigure 1.** Flowchart of Study Participant Exclusion Criteria in this Study

**eFigure 2.** The Proportional Reduction in Sum of Squares After the Addition of Obstructive Sleep Apnea Parameters or Additional Metabolic, Vascular, and Lifestyle Risk Factors for White Matter Hyperintensities Volumes and Counts of the Null Model

**eFigure 3.** Estimated Effect Sizes of Categorized Obstructive Sleep Apnea Parameters on White Matter Hyperintensities in Extended Regression Models

**eTable 1.** Characteristics of Complete Study Sample vs Excluded SHIP-Trend-0 Subcohort

**eTable 2.** Comparison of Study Sample Characteristics Between Subjects Without and With Obstructive Sleep Apnea

**eTable 3.** Results of the Linear Regression Analysis for White Matter Hyperintensity Counts With Respect to Obstructive Sleep Apnea Diagnostic Criteria

**eTable 4.** Results of the Linear Regression Analysis for White Matter Hyperintensities Volume and Count Data With Respect to Categorized Obstructive Sleep Apnea Diagnostic Criteria

**eTable 5.** Results of the Linear Regression Analysis for White Matter Hyperintensities Volume and Count Data With Respect to Obstructive Sleep Apnea (OSA) Diagnostic Criteria After Extending the Respective OSA Models by Additional Metabolic, Vascular, and Lifestyle Covariates

**eTable 6.** Results of the Linear Regression Analysis for White Matter Hyperintensities Volume and Count Data With Respect to Categorized Obstructive Sleep Apnea (OSA) Diagnostic Criteria After Extending the Respective OSA Models by Additional Metabolic, Vascular, and Lifestyle Covariates

**eTable 7.** Results of the Linear Regression Analysis for White Matter Hyperintensity Volumes and Counts With Respect to an Interaction Term Between Obstructive Sleep Apnea Diagnostic Criteria and Different Metabolic, Vascular, and Lifestyle Risk Factors, Which Were Tested Separately in Individual Regression Models

**eTable 8.** Results of the Linear Regression Analysis for Periventricular Frontal and Periventricular Dorsal White Matter Hyperintensity Volumes With Respect to Obstructive Sleep Apnea (OSA) Diagnostic Criteria After Extending the Respective OSA Models by Additional Metabolic, Vascular, and Lifestyle Covariates

**This supplementary material has been provided by the authors to give readers additional information about their work.**

## Supplementary Materials and Methods

### *Data assessment in SHIP-Trend-0*

Glycated hemoglobin (HbA1c) values were determined by high-performance liquid chromatography (Bio-Rad Diamat). Serum high-density lipoprotein (HDL), low-density lipoprotein (LDL), triglyceride, high-sensitive C-reactive protein (hsCRP) as well as total cholesterol values were measured photometrically (Hitachi 704, Roche and Dimension VISTA, Siemens Healthineers, Erlangen, Germany). White blood cell (WBC) counts were determined in EDTA whole blood (XT 2000, XE 5000 or SE 9000, Sysmex, Deutschland GmbH, Norderstedt, Germany, or Adivia 2120i, Siemens Healthineers, Erlangen, Germany), and the fibrinogen concentrations were determined in citrate plasma according to Clauss (BCS or BCS XP, Siemens Healthineers, Erlangen, Germany). Smoking was divided into three categories: current smoking, former smoking, and never smoked. The education level was defined according to the number of school attendance years, i.e., < 10 years, 10 years, and > 10 years. Study participants were considered as physically active, if they carried out at least one hour of sports per week in winter and/or in summer. Alcohol consumption was based on self-reported intake of alcohol within the last month<sup>1</sup>. Diabetes was defined based on known diabetes diagnosed by a physician, the intake of antidiabetic drugs (HTC-code A10), an HbA1c value  $\geq 6.5\%$ , and/or a spontaneous blood sugar  $\geq 11.1$  mmol/l. Depression was based on the Composite International Diagnostic - Screener questionnaire<sup>2,3</sup>.

After having completed the personal interview, study participants were medically examined, body height, weight, as well as hip and waist circumferences were measured, and the body-mass index (BMI) was calculated. After a 5 min resting phase, blood pressure was measured three times on the right arm of seated subjects with a digital blood pressure monitor (HEM-705 CP, Omron), and each reading being followed by a further resting period of 3 min. Cuffs were applied according to the circumference of the study participant's arm, and the mean of the second and third measurements was used for analyses. The intake of medications within the last 7 days was based on the packages

brought to the interview by the study participants. We focused on antidiabetic, antihypertensive, as well as lipid lowering drugs, reflecting cardiovascular disease risk factor indicators in the general population. Hypertension was diagnosed if the systolic blood pressure  $\geq 140$  mmHg, if the diastolic blood pressure  $\geq 90$  mmHg, and/or if antihypertensive drugs had been prescribed by a physician within the last year. Mental health was assessed employing the SF-12 mental health summary scale<sup>4-7</sup>.

#### *Magnetic resonance imaging acquisition parameters*

In brief, all images were acquired on a 1.5 T MRI scanner (Magnetom Avanto, Siemens Medical Systems, Erlangen, Germany) with an axial MPRAGE sequence and the following parameters: 1 x 1 mm in-plane spatial resolution, slice thickness = 1.0 mm (flip angle 15°), echo time = 3.4 ms and repetition time = 1,900 ms as well as axial  $T_2$ -FLAIR sequence with the following parameters: 0.9 x 0.9 mm in-plane spatial resolution, slice thickness = 3.0 mm (flip angle 15°), echo time = 325 ms and repetition time = 5,000 ms.

#### *Categorization of obstructive sleep apnea parameters*

OSA severity was categorized according to AHI values as follows: no OSA: AHI < 5/h of TST; mild OSA: AHI (5 – 15)/h of TST; moderate OSA: AHI (15 – 30)/h of TST; severe OSA: AHI  $\geq 30$ /h of TST<sup>8</sup>. The oxygen desaturation index (ODI) was defined as the number of  $\geq 4\%$  oxygen desaturations per hour of TST determined by pulse oximetry. OSA severity according to ODI values was categorized as follows: no OSA: ODI < 5/h of TST; mild OSA: ODI (5 – 15)/h of TST; moderate OSA: ODI (15 – 30)/h of TST; severe OSA: ODI  $\geq 30$ /h of TST<sup>9</sup>.

## **References**

1. Baumeister SE, Alte D, Meyer C, John U. Riskanter alkoholkonsum und alkoholbezogene störungen in Vorpommern: Die studie “leben und gesundheit in Vorpommern” (SHIP) und der

- Bundesgesundheitsurvey 1998 im vergleich. *Gesundheitswesen*. 2005. doi:10.1055/s-2004-813829
2. Wittchen MH, Gander F, Pfister H, et al. Screening for mental disorders: performance of the Composite International Diagnostic Screener (CID-S). *Int J Methods Psychiatr Res*. 1999;8(2):59-70.
  3. Grabe HJ, Baumeister SE, John U, Freyberger HJ, Völzke H. Association of mental distress with health care utilization and costs: A 5-year observation in a general population. *Soc Psychiatry Psychiatr Epidemiol*. 2009;44(10):835-844. doi:10.1007/s00127-009-0005-9
  4. Ware JE, Kosinski M, Keller SD. A 12-Item Short-Form Health Survey: Construction of Scales and Preliminary Tests of Reliability and Validity. *Med Care*. 1996. doi:10.1097/00005650-199603000-00003
  5. Bullinger M, Kirchberger I, Ware J. Der deutsche SF-36 Health Survey Übersetzung und psychometrische Testung eines krankheitsübergreifenden Instruments zur Erfassung der gesundheitsbezogenen Lebensqualität. *Z Gesundh Wiss*. 1995. doi:10.1007/BF02959944
  6. Bullinger M. German translation and psychometric testing of the SF-36 Health Survey: Preliminary results from the IQOLA project. *Soc Sci Med*. 1995. doi:10.1016/0277-9536(95)00115-N
  7. Ware JE, Sherbourne CD. The MOS 36-item short-form health survey (SF-36). I. Conceptual framework and item selection. *Med Care*. 1992.
  8. Stubbe B, Penzel T, Fietze I, et al. Polysomnography in a large population based study—the Study of Health in Pomerania protocol. 2016;2(1):1-5.
  9. Senaratna C V., Lowe A, Perret JL, et al. Comparison of apnoea–hypopnoea index and oxygen desaturation index when identifying obstructive sleep apnoea using type-4 sleep studies. *J Sleep Res*. 2018;(October):1-8. doi:10.1111/jsr.12804

## Supplementary Figures

**Supplementary Figure S1.** Flowchart of study participant exclusion criteria in this study.

Polysomnography (PSG) data was available for 1,109 study participants of SHIP-Trend-0. White matter hyperintensity (WMH) and intracranial volume (ICV) data were available from 1,959 and 1,907 SHIP-Trend-0 study participants, respectively. In total, WMH, ICV, and PSG data were available for 607 study participants. Further SHIP-Trend-0 study participant exclusions had to be carried out due to low quality WMH data ( $n = 29$ ), missing phenodata (diabetes status, glycated hemoglobin, depression status, physical activity parameters, hypertension status, blood pressure, smoking status, education status, SF-12 questionnaire evaluation, high-resolution C-reactive protein, alcohol consumption;  $n = 46$ ), and after assessment of the residual normality ( $n = 3$ ). For the analyses of regional WMH volume data, 392 SHIP-Trend-0 study participants could be included, since remaining study participants ( $n = 137$ ) had to be excluded due to missing regional WMH volume data.

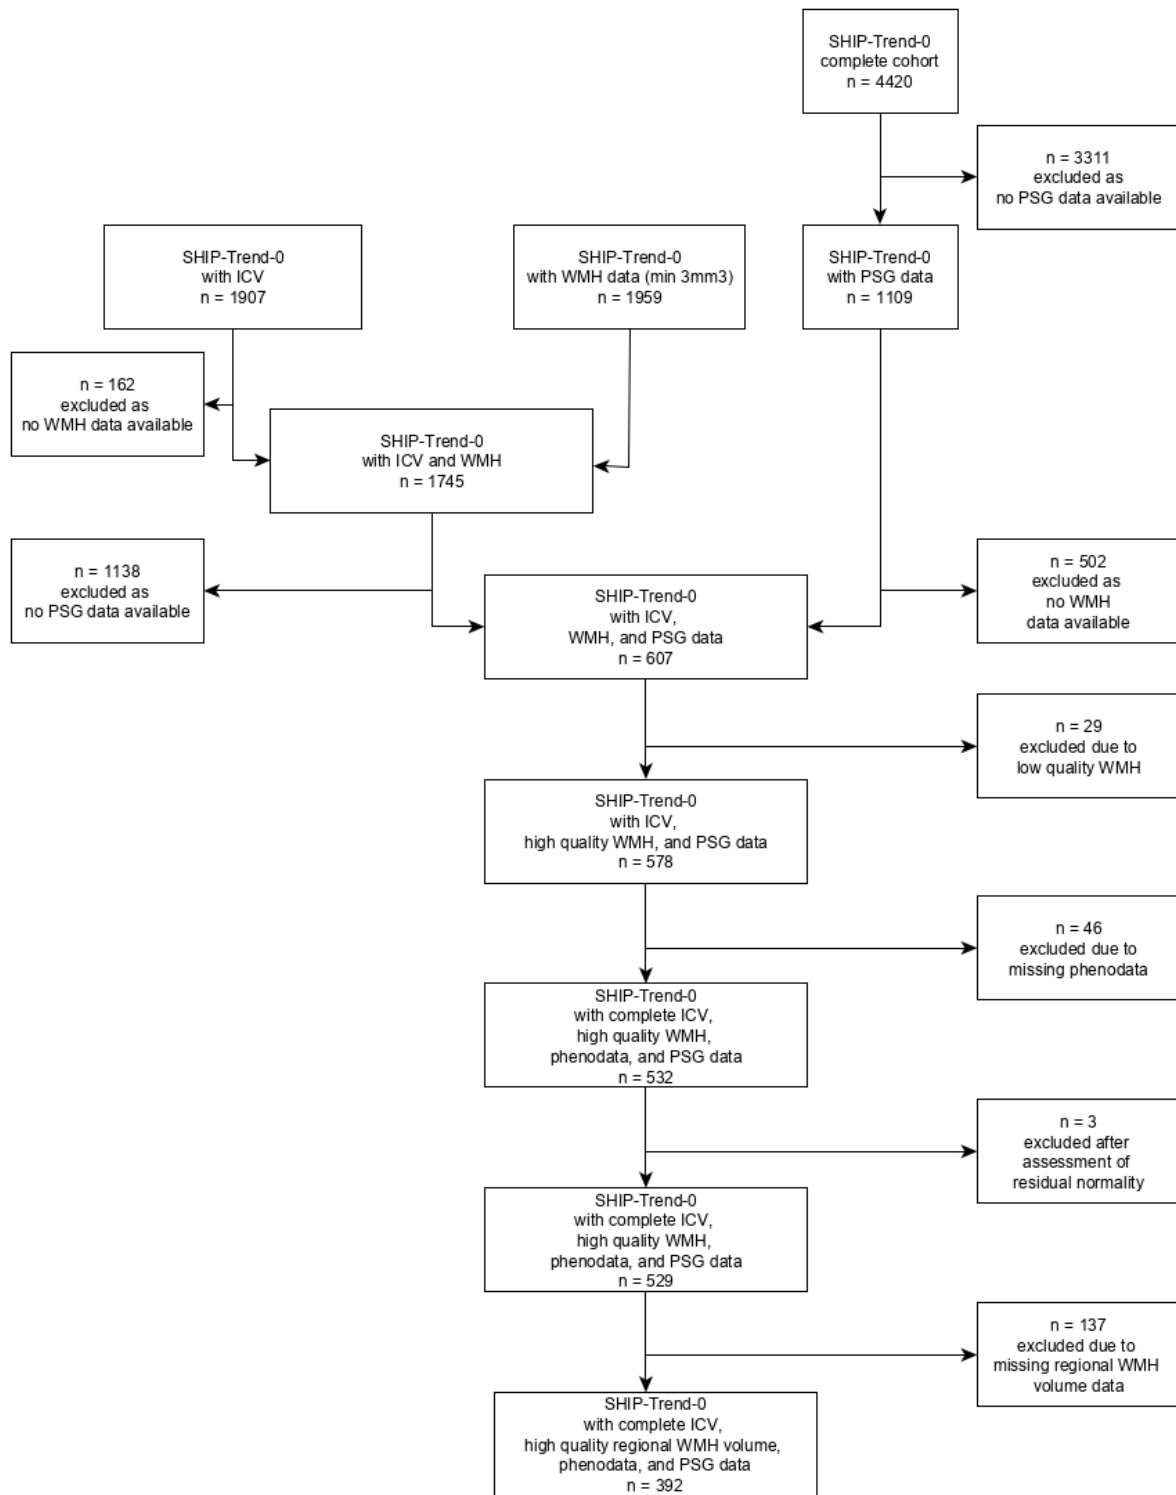

**Supplementary Figure S2.** The proportional reduction in sum of squares after the addition of OSA parameters or additional metabolic, vascular, and lifestyle risk factors for (a) white matter hyperintensities (WMH) volumes and (b) counts in a one-by-one fashion, as indicated on the y-axis, to the null model comprising sex, age modelled by a restricted cubic spline, intracranial volume, and body height. Corresponding *F* statistics (*p*-values for comparisons between the extended model against the null model) are given on the right side of each plot. Abbreviations: AHI, apnea-hypopnea index; HDL, high-density lipoprotein; LDL, low-density lipoprotein; ODI, oxygen desaturation index; OSA\_AHI, categorized obstructive sleep apnea defined according to AHI; OSA\_ODI, categorized obstructive sleep apnea defined according to ODI.

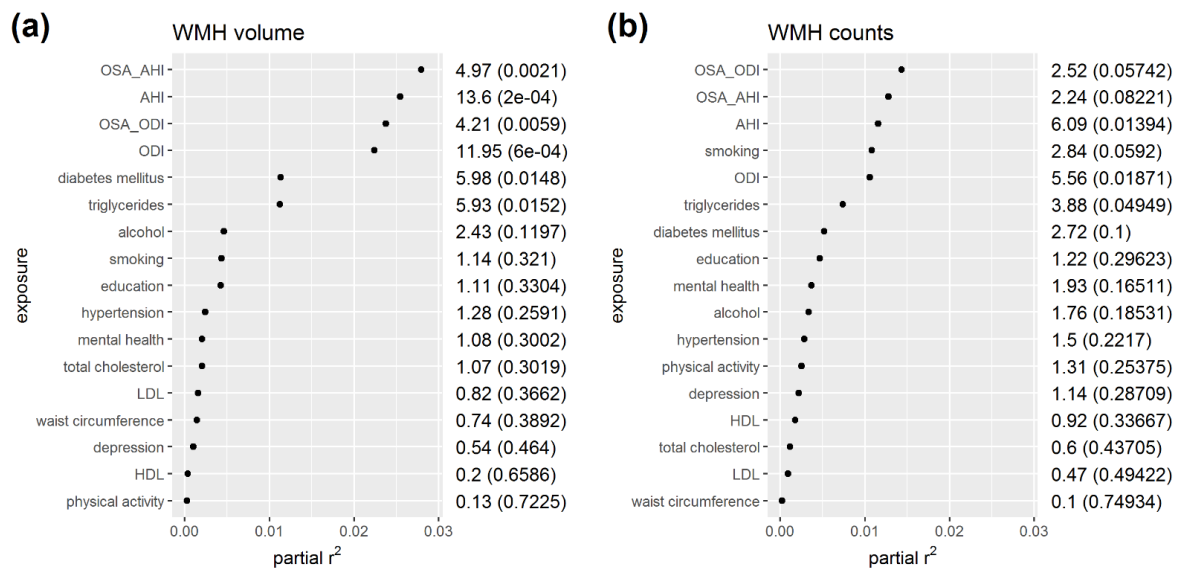

**Supplementary Figure S3.** Estimated effect sizes of categorized obstructive sleep apnea (OSA) parameters on white matter hyperintensities (WMH) in extended regression models. The x-axis gives the estimated effect sizes (regression coefficients  $\beta$ ) and 95% confidence intervals of obstructive sleep apnea defined by either apnea-hypopnea index ( $OSA_{AHI}$ ), or oxygen-desaturation index ( $OSA_{ODI}$ ), on (a) white matter hyperintensity (WMH) volumes and (b) counts after extension of the OSA regression models by the additional confounder variables given on the y-axis. The  $\beta$ -coefficients are either represented as circles in the case of significant associations ( $p$ -value  $< .05$ ) between the respective OSA parameter and WMH, or triangles in the case of non-significant associations ( $p$ -value  $\geq .05$ ). Dashed vertical lines mark the respective OSA  $\beta$ -coefficients in the OSA models only adjusted for sex, age modelled by a restricted cubic spline, intracranial volume, and body height. The full model includes the respective OSA parameter, the complete set of metabolic, vascular, and lifestyle covariates, as well as the null model covariates. No OSA was considered as the reference category. Mild, moderate, and severe  $OSA_{AHI}$   $\beta$ -coefficients are plotted in red, green, and blue, respectively. Mild, moderate, and severe  $OSA_{ODI}$   $\beta$ -coefficients are plotted in olive green, turquoise, and violet, respectively. Abbreviations: AHI, apnea-hypopnea index; HDL, high-density lipoprotein; LDL, low-density lipoprotein; ODI, oxygen desaturation index; OSA, obstructive sleep apnea; WMH, white matter hyperintensities.



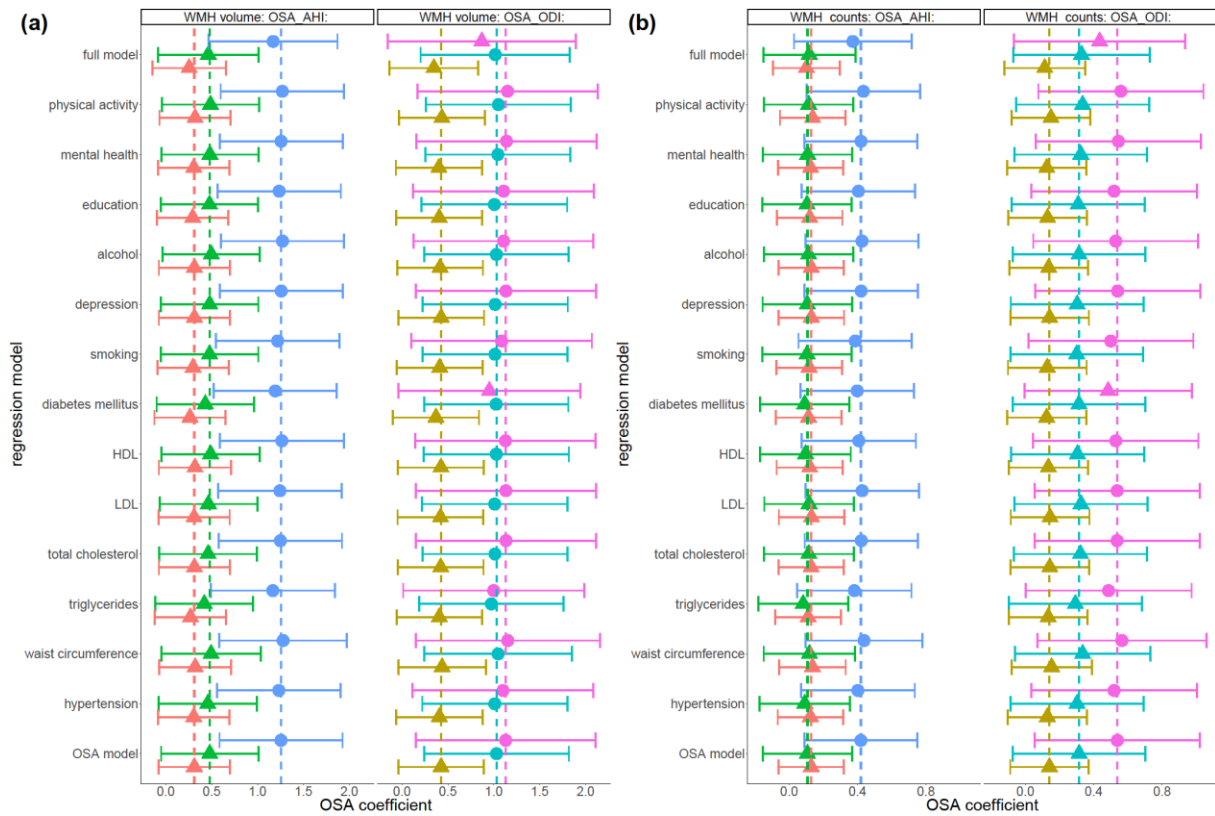

## Supplementary Tables

### Supplementary Table S1. Characteristics of complete study sample versus excluded SHIP-Trend-0

subcohort. Abbreviations: AHI, apnea hypopnea index; BMI, body-mass index; d, days; IQR, interquartile range; NA, not assigned value; NREM, non- Rapid Eye Movement sleep; OS, oxygen saturation; REM, Rapid Eye Movement sleep; SD, standard deviation; T1DM, type-1 diabetes mellitus; T2DM, type-2 diabetes mellitus; TST, total sleep time. <sup>a</sup>*P*-values for categorical variables were calculated using Pearson's Chi-squared test, *p*-values for continuous variables were calculated using a two-sided *t*-test assuming unequal variance. \*Significance level at *p* < 0.05.

|                                                       | SHIP-Trend-0 included | Number of NAs in SHIP-Trend-0 included | SHIP-Trend-0 excluded | Number of NAs in SHIP-Trend-0 excluded | <i>p</i> -value <sup>a</sup> |
|-------------------------------------------------------|-----------------------|----------------------------------------|-----------------------|----------------------------------------|------------------------------|
|                                                       | ( <i>n</i> = 529)     |                                        | ( <i>n</i> = 3,891)   |                                        |                              |
| <b>Demographic and clinical chemistry parameters:</b> |                       |                                        |                       |                                        |                              |
|                                                       | <b>mean (SD)</b>      | <b><i>n</i></b>                        | <b>mean (SD)</b>      | <b><i>n</i></b>                        |                              |
| Age, years                                            | 52.15 (13.58)         | 0                                      | 51.93 (15.70)         | 0                                      | .74                          |
| Systolic blood pressure, mmHg                         | 126.83 (16.98)        | 0                                      | 128.14 (18.90)        | 19                                     | .10                          |
| Diastolic blood pressure, mmHg                        | 77.36 (9.44)          | 0                                      | 77.27 (10.36)         | 20                                     | .84                          |
| Glycated hemoglobin (HbA1c), %                        | 5.33 (0.73)           | 0                                      | 5.38 (0.85)           | 9                                      | .22                          |
| Total cholesterol, mmol/l                             | 5.56 (1.09)           | 0                                      | 5.43 (1.14)           | 7                                      | .01*                         |
| Total triglycerides, mmol/l                           | 1.58 (1.12)           | 0                                      | 1.69 (1.23)           | 7                                      | .05*                         |
| High-density lipoprotein, mmol/l                      | 1.44 (0.35)           | 0                                      | 1.43 (0.39)           | 7                                      | .56                          |
| Low-density lipoprotein, mmol/l                       | 3.48 (0.92)           | 0                                      | 3.33 (0.97)           | 7                                      | < .001*                      |
| Waist circumference, cm                               | 90.16 (12.78)         | 0                                      | 91.40 (14.78)         | 14                                     | .04*                         |
| Hip circumference, cm                                 | 102.28 (9.17)         | 0                                      | 102.67 (10.95)        | 9                                      | .37                          |
| Body height, cm                                       | 169.87 (9.08)         | 0                                      | 169.82 (9.41)         | 7                                      | .91                          |
| Body weight, kg                                       | 80.90 (14.62)         | 0                                      | 81.28 (17.18)         | 5                                      | .58                          |
| BMI, kg/m <sup>2</sup>                                | 27.99 (4.34)          | 0                                      | 28.14 (5.34)          | 7                                      | .48                          |
| C-reactive protein, mg/l                              | 2.61 (5.12)           | 0                                      | 2.62 (4.92)           | 199                                    | .98                          |
| Fibrinogen, g/l                                       | 3.08 (0.74)           | 5                                      | 3.07 (0.74)           | 43                                     | .79                          |
| White blood cell counts, Gpt/l                        | 5.81 (2.71)           | 1                                      | 6.22 (2.53)           | 14                                     | .001*                        |
| Alcohol within last 30d, g/d                          | 8.65 (11.88)          | 0                                      | 73.46 (2,806.67)      | 20                                     | .15                          |
| Subjective mental health summary scale                | 52.98 (8.50)          | 0                                      | 52.37 (8.63)          | 110                                    | .12                          |
|                                                       | <b><i>n</i> (%)</b>   | <b><i>n</i></b>                        | <b><i>n</i> (%)</b>   | <b><i>n</i></b>                        |                              |
| Sex, women                                            | 282 (53)              | 0                                      | 1,993 (51)            | 0                                      | .39                          |
| Diabetes (T1DM or T2DM)                               | 53 (10)               | 0                                      | 497 (13)              | 20                                     | .08                          |
| Cigarette smoking                                     |                       | 0                                      |                       | 22                                     | < .001*                      |
| Never-smoker                                          | 233 (44)              |                                        | 1,372 (35)            |                                        |                              |
| Ex-smoker                                             | 202 (38)              |                                        | 1,408 (36)            |                                        |                              |
| Current smoker                                        | 94 (18)               |                                        | 1,089 (28)            |                                        |                              |
| Physical activity                                     | 392 (74)              | 0                                      | 2,646 (68)            | 22                                     | .009*                        |
| Education                                             |                       | 0                                      |                       | 13                                     | < .001*                      |
| < 10 years                                            | 71 (13)               |                                        | 963 (25)              |                                        |                              |
| 10 years                                              | 278 (53)              |                                        | 1,987 (51)            |                                        |                              |
| > 10 years                                            | 180 (34)              |                                        | 928 (24)              |                                        |                              |
| Lifetime Depression Medication                        | 163 (31)              | 0                                      | 1,061 (28)            | 92                                     | .18                          |

|                                                          |                           |          |                           |          |         |
|----------------------------------------------------------|---------------------------|----------|---------------------------|----------|---------|
| Anti-diabetic drugs                                      | 25 (5)                    | 0        | 322 (8)                   | 0        | .006*   |
| Antihypertensive drugs                                   | 184 (35)                  | 0        | 1,524 (39)                | 0        | 0.06    |
| Lipid lowering drugs                                     | 48 (9)                    | 0        | 573 (15)                  | 0        | < .001* |
| <b>Hypertension</b>                                      | 240 (45)                  | 0        | 1,875 (48)                | 21       | .12     |
| <b>Sleep questionnaire parameters:</b>                   |                           |          |                           |          |         |
|                                                          | <b>n (%)</b>              | <b>n</b> | <b>n (%)</b>              | <b>n</b> |         |
| <b>Sleep time normal work day, mean (SD), h</b>          | 6.92 (1.26)               | 0        | 8.85 (42.16)              | 27       | .005*   |
| <b>No nap in last 7d</b>                                 | 307 (58)                  | 0        | 2,147 (56)                | 27       | .31     |
| <b>How often &gt; 30min for falling asleep per week?</b> |                           | 0        |                           | 27       | .38     |
| 4 - 7 times                                              | 104 (20)                  |          | 681 (18)                  |          |         |
| 1 - 3 times                                              | 116 (22)                  |          | 802 (21)                  |          |         |
| < 1 time per week                                        | 84 (16)                   |          | 560 (14)                  |          |         |
| no problems falling asleep                               | 224 (42)                  |          | 1,815 (47)                |          |         |
| don't know                                               | 1 (0)                     |          | 6 (0)                     |          |         |
| <b>How often awake during night &gt; 30min per week?</b> |                           | 0        |                           | 27       | .01*    |
| 4 - 7 times                                              | 64 (12)                   |          | 401 (10)                  |          |         |
| 1 - 3 times                                              | 81 (15)                   |          | 549 (14)                  |          |         |
| < 1 time per week                                        | 83 (16)                   |          | 424 (11)                  |          |         |
| no problems staying asleep                               | 134 (25)                  |          | 1,144 (30)                |          |         |
| often wakes up during night, but gets back to sleep      | 166 (31)                  |          | 1,343 (35)                |          |         |
| don't know                                               | 1 (0)                     |          | 2 (0)                     |          |         |
| answer refused                                           | 0 (0)                     |          | 1 (0)                     |          |         |
| <b>snoring</b>                                           |                           | 0        |                           | 27       | < .001* |
| regularly                                                | 141 (27)                  |          | 732 (19)                  |          |         |
| occasionally                                             | 245 (46)                  |          | 1,811 (47)                |          |         |
| never                                                    | 106 (20)                  |          | 1,082 (28)                |          |         |
| don't know                                               | 37 (7)                    |          | 239 (6)                   |          |         |
| <b>Magnetic resonance imaging parameters:</b>            |                           |          |                           |          |         |
|                                                          | <b>mean (SD)</b>          | <b>n</b> | <b>mean (SD)</b>          | <b>n</b> |         |
| <b>Intracranial volume, mm<sup>3</sup></b>               | 1,581,582.54 (155,427.52) | 0        | 1,581,575.48 (154,957.24) | 2513     | > .99   |
| <b>WMH volume, median (IQR), mm<sup>3</sup></b>          | 208 (83 - 590)            | 0        | 200.5 (76 - 519)          | 2461     | .07     |
| <b>WMH counts</b>                                        | 13.55 (10.61)             | 0        | 13.96 (12.81)             | 2461     | .48     |

**Supplementary Table S2.** Comparison of study sample characteristics between subjects without and with obstructive sleep apnea (OSA). (a) OSA defined according to apnea-hypopnea index (AHI) criteria, and (b) OSA defined according to oxygen desaturation index (ODI) criteria. Abbreviations: AHI: apnea-hypopnea index, ODI: oxygen desaturation index, OSA: obstructive sleep apnea, TST: total sleep time. <sup>a</sup>*P*-values for categorical variables were calculated using Pearson's Chi-squared test, *p*-values for continuous variables were calculated using a two-sided *t*-test assuming unequal variance.

\*Significance level at *p* < .05.

| <b>(a) OSA defined according to AHI criteria.</b>     |                                                |                                           |                            |
|-------------------------------------------------------|------------------------------------------------|-------------------------------------------|----------------------------|
|                                                       | <b>No OSA group (AHI &lt; 5h/TST; n = 320)</b> | <b>OSA group (AHI ≥ 5 h/TST; n = 209)</b> | <b>P-value<sup>a</sup></b> |
| <b>Demographic and clinical chemistry parameters:</b> |                                                |                                           |                            |
|                                                       | <b>mean (SD)</b>                               | <b>mean (SD)</b>                          |                            |
| <b>Age, years</b>                                     | 47.91 (13.80)                                  | 58.64 (10.31)                             | < .001*                    |
| <b>Systolic blood pressure, mmHg</b>                  | 122.69 (15.68)                                 | 133.17 (16.96)                            | < .001*                    |
| <b>Diastolic blood pressure, mmHg</b>                 | 75.64 (8.52)                                   | 79.98 (10.18)                             | < .001*                    |
| <b>Glycated hemoglobin (HbA1c), %</b>                 | 5.17 (0.63)                                    | 5.59 (0.79)                               | < .001*                    |
| <b>Total cholesterol, mmol/l</b>                      | 5.49 (1.11)                                    | 5.67 (1.05)                               | .06                        |
| <b>Total triglycerides, mmol/l</b>                    | 1.38 (0.89)                                    | 1.90 (1.34)                               | < .001*                    |
| <b>High-density lipoprotein, mmol/l</b>               | 1.52 (0.37)                                    | 1.33 (0.29)                               | < .001*                    |
| <b>Low-density lipoprotein, mmol/l</b>                | 3.38 (0.94)                                    | 3.63 (0.86)                               | .002*                      |
| <b>Waist circumference, cm</b>                        | 85.85 (11.80)                                  | 96.76 (11.36)                             | < .001*                    |
| <b>Hip circumference, cm</b>                          | 100.48 (8.94)                                  | 105.04 (8.83)                             | < .001*                    |
| <b>Body height, cm</b>                                | 169.78 (9.07)                                  | 169.99 (9.13)                             | .80                        |
| <b>Body weight, kg</b>                                | 77.21 (13.76)                                  | 86.54 (14.13)                             | < .001*                    |
| <b>BMI, kg/m<sup>2</sup></b>                          | 26.74 (4.03)                                   | 29.91 (4.10)                              | < .001*                    |
| <b>C-reactive protein, mg/l</b>                       | 2.20 (3.02)                                    | 3.24 (7.20)                               | .05*                       |
| <b>Fibrinogen, g/l</b>                                | 2.97 (0.65)                                    | 3.25 (0.83)                               | < .001*                    |
| <b>White blood cell counts, Gpt/l</b>                 | 5.65 (1.54)                                    | 6.07 (3.87)                               | .14                        |
| <b>Alcohol within last 30d, g/d</b>                   | 7.90 (11.49)                                   | 9.79 (12.39)                              | .08                        |
| <b>Subjective mental health summary scale</b>         | 52.52 (8.37)                                   | 53.67 (8.66)                              | .13                        |
|                                                       | <b>n (%)</b>                                   | <b>n (%)</b>                              |                            |
| <b>Sex, women</b>                                     | 199 (62)                                       | 83 (40)                                   | < .001*                    |
| <b>Diabetes (T1DM or T2DM)</b>                        | 16 (5)                                         | 37 (18)                                   | < .001*                    |
| <b>Cigarette smoking</b>                              |                                                |                                           | .002*                      |
| Never-smoker                                          | 151 (47)                                       | 82 (39)                                   |                            |
| Ex-smoker                                             | 103 (32)                                       | 99 (47)                                   |                            |
| Current smoker                                        | 66 (21)                                        | 28 (13)                                   |                            |
| <b>Physical activity</b>                              | 244 (76)                                       | 148 (71)                                  | .20                        |
| <b>Education</b>                                      |                                                |                                           | .004*                      |
| < 10 years                                            | 31 (10)                                        | 40 (19)                                   |                            |
| 10 years                                              | 170 (53)                                       | 108 (52)                                  |                            |
| > 10 years                                            | 119 (37)                                       | 61 (29)                                   |                            |
| <b>Lifetime Depression</b>                            | 105 (33)                                       | 58 (28)                                   | .26                        |
| <b>Medication</b>                                     |                                                |                                           |                            |
| Anti-diabetic drugs                                   | 7 (2)                                          | 18 (9)                                    | .001*                      |
| Antihypertensive drugs                                | 79 (25)                                        | 105 (50)                                  | < .001*                    |
| Lipid lowering drugs                                  | 18 (6)                                         | 30 (14)                                   | .001*                      |
| <b>Hypertension</b>                                   | 108 (34)                                       | 132 (63)                                  | < .001*                    |

| Sleep questionnaire parameters:                     |                                          |                                          |         |
|-----------------------------------------------------|------------------------------------------|------------------------------------------|---------|
|                                                     | <i>n</i> (%)                             | <i>n</i> (%)                             |         |
| Sleep time normal work day, mean (SD), h            | 6.88 (1.27)                              | 7.00 (1.25)                              | .28     |
| No nap in last 7d                                   | 213 (67)                                 | 94 (45)                                  | < .001* |
| How often > 30min for falling asleep per week?      |                                          |                                          | .28     |
| 4 - 7 times                                         | 62 (19)                                  | 42 (20)                                  |         |
| 1 - 3 times                                         | 65 (20)                                  | 51 (24)                                  |         |
| < 1 time per week                                   | 58 (18)                                  | 26 (12)                                  |         |
| no problems falling asleep                          | 135 (42)                                 | 89 (43)                                  |         |
| don't know                                          | 0 (0)                                    | 1 (0)                                    |         |
| How often awake during night > 30min per week?      |                                          |                                          | .36     |
| 4 - 7 times                                         | 43 (13)                                  | 21 (10)                                  |         |
| 1 - 3 times                                         | 43 (13)                                  | 38 (18)                                  |         |
| < 1 time per week                                   | 49 (15)                                  | 34 (16)                                  |         |
| no problems staying asleep                          | 86 (27)                                  | 48 (23)                                  |         |
| often wakes up during night, but gets back to sleep | 99 (31)                                  | 67 (32)                                  |         |
| don't know                                          | 0 (0)                                    | 1 (0)                                    |         |
| answer refused                                      | 0 (0)                                    | 0 (0)                                    |         |
| Snoring                                             |                                          |                                          | < .001* |
| regularly                                           | 57 (18)                                  | 84 (40)                                  |         |
| occasionally                                        | 143 (45)                                 | 102 (49)                                 |         |
| never                                               | 92 (29)                                  | 14 (7)                                   |         |
| don't know                                          | 28 (9)                                   | 9 (4)                                    |         |
| Magnetic resonance imaging parameters:              |                                          |                                          |         |
|                                                     | mean (SD)                                | mean (SD)                                |         |
| Intracranial volume, mm <sup>3</sup>                | 1.57e <sup>6</sup> (0.15e <sup>6</sup> ) | 1.60e <sup>6</sup> (0.16e <sup>6</sup> ) | .06     |

| (b) OSA defined according to ODI criteria.     |                                             |                                          |                              |
|------------------------------------------------|---------------------------------------------|------------------------------------------|------------------------------|
|                                                | No OSA group (ODI < 5h/TST; <i>n</i> = 427) | OSA group (ODI ≥ 5h/TST; <i>n</i> = 102) | <i>P</i> -value <sup>a</sup> |
| Demographic and clinical chemistry parameters: |                                             |                                          |                              |
|                                                | mean (SD)                                   | mean (SD)                                |                              |
| Age, years                                     | 50.15 (13.52)                               | 60.49 (10.32)                            | < .001*                      |
| Systolic blood pressure, mmHg                  | 124.64 (16.14)                              | 135.98 (17.39)                           | < .001*                      |
| Diastolic blood pressure, mmHg                 | 76.29 (8.66)                                | 81.80 (11.18)                            | < .001*                      |
| Glycated hemoglobin (HbA1c), %                 | 5.24 (0.67)                                 | 5.71 (0.84)                              | < .001*                      |
| Total cholesterol, mmol/l                      | 5.53 (1.11)                                 | 5.66 (0.99)                              | .24                          |
| Total triglycerides, mmol/l                    | 1.50 (0.99)                                 | 1.93 (1.50)                              | .007*                        |
| High-density lipoprotein, mmol/l               | 1.47 (0.36)                                 | 1.31 (0.30)                              | < .001*                      |
| Low-density lipoprotein, mmol/l                | 3.44 (0.94)                                 | 3.65 (0.82)                              | .02*                         |
| Waist circumference, cm                        | 87.70 (11.82)                               | 100.46 (11.51)                           | < .001*                      |
| Hip circumference, cm                          | 101.22 (9.01)                               | 106.73 (8.52)                            | < .001*                      |
| Body height, cm                                | 169.77 (9.15)                               | 170.26 (8.85)                            | .62                          |
| Body weight, kg                                | 78.68 (13.71)                               | 90.21 (14.72)                            | < .001*                      |
| BMI, kg/m <sup>2</sup>                         | 27.26 (4.09)                                | 31.04 (4.03)                             | < .001*                      |
| C-reactive protein, mg/l                       | 2.39 (4.55)                                 | 3.56 (6.94)                              | .11                          |
| Fibrinogen, g/l                                | 3.04 (0.72)                                 | 3.26 (0.79)                              | .01*                         |
| White blood cell counts, Gpt/l                 | 5.67 (1.56)                                 | 6.42 (5.28)                              | .16                          |
| Alcohol within last 30d, g/d                   | 8.06 (11.21)                                | 11.11 (14.14)                            | .04*                         |
| Subjective mental health summary scale         | 52.86 (8.48)                                | 53.46 (8.60)                             | .53                          |
|                                                | <i>n</i> (%)                                | <i>n</i> (%)                             |                              |
| Sex, women                                     | 248 (58)                                    | 34 (33)                                  | < .001*                      |
| Diabetes (T1DM or T2DM)                        | 30 (7)                                      | 23 (23)                                  | < .001*                      |

|                                                          |                                          |                                          |         |
|----------------------------------------------------------|------------------------------------------|------------------------------------------|---------|
| <b>Cigarette smoking</b>                                 |                                          |                                          | .006*   |
| Never-smoker                                             | 197 (46)                                 | 36 (35)                                  |         |
| Ex-smoker                                                | 149 (35)                                 | 53 (52)                                  |         |
| Current smoker                                           | 81 (19)                                  | 13 (13)                                  |         |
| <b>Physical activity</b>                                 | 323 (76)                                 | 69 (68)                                  | .13     |
| <b>Education</b>                                         |                                          |                                          | < .001* |
| < 10 years                                               | 46 (11)                                  | 25 (25)                                  |         |
| 10 years                                                 | 228 (53)                                 | 50 (49)                                  |         |
| > 10 years                                               | 153 (36)                                 | 27 (26)                                  |         |
| <b>Lifetime Depression</b>                               | 139 (33)                                 | 24 (24)                                  | .10     |
| <b>Medication</b>                                        |                                          |                                          |         |
| Anti-diabetic drugs                                      | 15 (4)                                   | 10 (10)                                  | .02*    |
| Antihypertensive drugs                                   | 125 (29)                                 | 59 (58)                                  | < .001* |
| Lipid lowering drugs                                     | 31 (7)                                   | 17 (17)                                  | .005*   |
| <b>Hypertension</b>                                      | 165 (39)                                 | 75 (74)                                  | < .001* |
| <b>Sleep questionnaire parameters:</b>                   |                                          |                                          |         |
|                                                          | <b>n (%)</b>                             | <b>n (%)</b>                             |         |
| <b>Sleep time normal work day, mean (SD), h</b>          | 6.88 (1.26)                              | 7.12 (1.26)                              | .08     |
| <b>No nap in last 7d</b>                                 | 267 (63)                                 | 40 (39)                                  | < .001* |
| <b>How often &gt; 30min for falling asleep per week?</b> |                                          |                                          |         |
| 4 - 7 times                                              | 88 (21)                                  | 16 (16)                                  |         |
| 1 - 3 times                                              | 91 (21)                                  | 25 (25)                                  |         |
| < 1 time per week                                        | 70 (16)                                  | 14 (14)                                  |         |
| no problems falling asleep                               | 178 (42)                                 | 46 (45)                                  |         |
| don't know                                               | 0 (0)                                    | 1 (1)                                    |         |
| <b>How often awake during night &gt; 30min per week?</b> |                                          |                                          | .19     |
| 4 - 7 times                                              | 55 (13)                                  | 9 (9)                                    |         |
| 1 - 3 times                                              | 64 (15)                                  | 17 (17)                                  |         |
| < 1 time per week                                        | 66 (15)                                  | 17 (17)                                  |         |
| no problems staying asleep                               | 103 (24)                                 | 31 (30)                                  |         |
| often wakes up during night, but gets back to sleep      | 139 (33)                                 | 27 (26)                                  |         |
| don't know                                               | 0 (0)                                    | 1 (1)                                    |         |
| answer refused                                           | 0 (0)                                    | 0 (0)                                    |         |
| <b>snoring</b>                                           |                                          |                                          | < .001* |
| regularly                                                | 92 (22)                                  | 49 (48)                                  |         |
| occasionally                                             | 205 (48)                                 | 40 (39)                                  |         |
| never                                                    | 99 (23)                                  | 7 (7)                                    |         |
| don't know                                               | 31 (7)                                   | 6 (6)                                    |         |
| <b>Magnetic resonance imaging parameters:</b>            |                                          |                                          |         |
|                                                          | <b>mean (SD)</b>                         | <b>mean (SD)</b>                         |         |
| <b>Intracranial volume, mm<sup>3</sup></b>               | 1.58e <sup>6</sup> (0.15e <sup>6</sup> ) | 1,61e <sup>6</sup> (0.17e <sup>6</sup> ) | .09     |

**Supplementary Table S3.** Results of the linear regression analysis for white matter hyperintensity (WMH) counts with respect to obstructive sleep apnea diagnostic criteria. The null model regressed the independent variables WMH counts on the explanatory variables sex, age modelled by a restricted cubic spline, intracranial volume, and body height. The OSA model extended the explanatory variables of the null model by either (a) apnea-hypopnea (AHI) or (b) oxygen desaturation index (ODI), respectively. Abbreviations: AHI, apnea-hypopnea index; df, degrees of freedom; ICV, intracranial volume; ODI, oxygen desaturation index; rcs, restricted cubic spline; se, standard error. \* $P$ -value < .05; <sup>a</sup>WMH count data has been  $\log_2$ -transformed after the addition of a pseudocount of 1; <sup>b</sup> $p$ -values were calculated using a Wald test.

(a) AHI regression models

|                         | WMH count <sup>a</sup>               |            |                                      |            |
|-------------------------|--------------------------------------|------------|--------------------------------------|------------|
|                         | Null model                           |            | AHI model                            |            |
|                         | $\beta$ (se)                         | $p$ -value | $\beta$ (se)                         | $p$ -value |
| Constant                | -1.626 (1.194)                       | .18        | -1.649 (1.189)                       | .17        |
| AHI                     |                                      |            | 0.008 (0.003)                        | .01*       |
| Female sex              | -0.238 (0.111)                       | .03*       | -0.183 (0.113)                       | .11        |
| rcs age                 | 0.047 (0.010)                        | < .001*    | 0.045 (0.010)                        | < .001*    |
| rcs age'                | 0.013 (0.022)                        | .56        | 0.012 (0.022)                        | .58        |
| rcs age''               | -0.105 (0.110)                       | .34        | -0.103 (0.110)                       | .35        |
| ICV                     | 1e <sup>-6</sup> (3e <sup>-7</sup> ) | < .001*    | 1e <sup>-6</sup> (3e <sup>-7</sup> ) | < .001*    |
| Body height             | 0.003 (0.006)                        | .62        | 0.003 (0.006)                        | .62        |
| Observations            | 529                                  |            |                                      |            |
| R <sup>2</sup>          | 0.390                                |            | 0.397                                |            |
| Adjusted R <sup>2</sup> | 0.383                                |            | 0.389                                |            |
| Residual Std. Error     | 0.854 (df = 522)                     |            | 0.850 (df = 521)                     |            |

(b) ODI regression models

|                         | WMH count <sup>a</sup>               |            |                                      |                    |
|-------------------------|--------------------------------------|------------|--------------------------------------|--------------------|
|                         | Null model                           |            | ODI model                            |                    |
|                         | $\beta$ (se)                         | $p$ -value | $\beta$ (se)                         | $p$ -value         |
| Constant                | -1.626 (1.194)                       | .18        | -1.772 (1.191)                       | .14                |
| ODI                     |                                      |            | 0.011 (0.005)                        | .02*               |
| Female sex              | -0.238 (0.111)                       | .03*       | -0.187 (0.113)                       | .10                |
| rcs age                 | 0.047 (0.010)                        | < .001*    | 0.046 (0.010)                        | 2e <sup>-5</sup> * |
| rcs age'                | 0.013 (0.022)                        | .56        | 0.012 (0.022)                        | 0.574              |
| rcs age''               | -0.105 (0.110)                       | .34        | -0.105 (0.110)                       | 0.340              |
| ICV                     | 1e <sup>-6</sup> (3e <sup>-7</sup> ) | < .001*    | 1e <sup>-6</sup> (3e <sup>-7</sup> ) | < .001*            |
| Body height             | 0.003 (0.006)                        | .62        | 0.004 (0.006)                        | .57                |
| Observations            | 529                                  |            |                                      |                    |
| R <sup>2</sup>          | 0.390                                |            | 0.396                                |                    |
| Adjusted R <sup>2</sup> | 0.383                                |            | 0.388                                |                    |
| Residual Std. Error     | 0.854 (df = 522)                     |            | 0.851 (df = 521)                     |                    |

**Supplementary Table S4.** Results of the linear regression analysis for white matter hyperintensities (WMH) volume and count data with respect to categorized obstructive sleep apnea (OSA) diagnostic criteria. OSA diagnosed according to the apnea-hypopnea index (OSA<sub>AHI</sub>) was categorized as follows: no OSA: AHI < 5/h of total sleep time (TST); mild OSA: AHI (5 – 15)/h of TST; moderate OSA: AHI (15 – 30)/h of TST; severe OSA: AHI ≥ 30/h of TST. OSA diagnosed according to the oxygen desaturation index (OSA<sub>ODI</sub>) was categorized as follows: no OSA: ODI < 5/h of TST; mild OSA: ODI (5 – 15)/h of TST; moderate OSA: ODI (15 – 30)/h of TST; severe OSA: ODI ≥ 30/h of TST. No OSA was considered as the reference category. The null model regressed the independent variables WMH volumes or counts on the explanatory variables sex, age modelled by a restricted cubic spline, intracranial volume, and body height. The OSA model extended the explanatory variables of the null model by either categorized (a) OSA<sub>AHI</sub> or (b) OSA<sub>ODI</sub>, respectively. Abbreviations: AHI, apnea-hypopnea index; df, degrees of freedom ICV, intracranial volume; ODI, oxygen desaturation index; rcs, restricted cubic spline; se, standard error; df, degrees of freedom. \**P*-value < .05; <sup>a</sup>WMH volume and count data have been log<sub>2</sub>-transformed after the addition of a pseudocount of 1; <sup>b</sup>*p*-values were calculated using a Wald test.

| (a) AHI regression models   |                                         |                 |                                         |                 |                                         |                        |                                      |                 |  |  |
|-----------------------------|-----------------------------------------|-----------------|-----------------------------------------|-----------------|-----------------------------------------|------------------------|--------------------------------------|-----------------|--|--|
|                             | WMH volume <sup>a</sup>                 |                 |                                         |                 |                                         | WMH count <sup>a</sup> |                                      |                 |  |  |
|                             | Null model                              |                 | AHI model                               |                 |                                         | Null model             |                                      | AHI model       |  |  |
|                             | <i>β</i> (se)                           | <i>p</i> -value | <i>β</i> (se)                           | <i>p</i> -value | <i>β</i> (se)                           | <i>p</i> -value        | <i>β</i> (se)                        | <i>p</i> -value |  |  |
| <b>Constant</b>             | -0.581<br>(2.438)                       | .81             | -0.700<br>(2.413)                       | .77             | -1.626<br>(1.194)                       | .18                    | -1.690<br>(1.191)                    | .16             |  |  |
| <b>AHI</b>                  |                                         |                 |                                         |                 |                                         |                        |                                      |                 |  |  |
| mild OSA <sub>AHI</sub>     |                                         |                 | 0.312<br>(0.197)                        | .12             |                                         |                        | 0.129<br>(0.097)                     | .18             |  |  |
| moderate OSA <sub>AHI</sub> |                                         |                 | 0.480<br>(0.270)                        | .08             |                                         |                        | 0.107<br>(0.133)                     | .42             |  |  |
| severe OSA <sub>AHI</sub>   |                                         |                 | 1.255<br>(0.341)                        | < .001*         |                                         |                        | 0.419<br>(0.168)                     | .01*            |  |  |
| <b>Sex</b>                  | -0.232<br>(0.227)                       | .31             | -0.041<br>(0.231)                       | .86             | -0.238<br>(0.111)                       | .03*                   | -0.172<br>(0.114)                    | .13             |  |  |
| <b>r<sub>c</sub>s age</b>   | 0.089<br>(0.021)                        | < .001*         | 0.081<br>(0.021)                        | < .001*         | 0.047<br>(0.010)                        | < .001*                | 0.044<br>(0.011)                     | < .001*         |  |  |
| <b>r<sub>c</sub>s age'</b>  | 0.031<br>(0.045)                        | .50             | 0.030<br>(0.045)                        | .50             | 0.013<br>(0.022)                        | .56                    | 0.014<br>(0.022)                     | .54             |  |  |
| <b>r<sub>c</sub>s age''</b> | -0.112<br>(0.225)                       | .62             | -0.112<br>(0.223)                       | .62             | -0.105<br>(0.110)                       | .34                    | -0.109<br>(0.110)                    | .33             |  |  |
| <b>ICV</b>                  | 3e <sup>-6</sup><br>(1e <sup>-6</sup> ) | < .001*         | 3e <sup>-6</sup><br>(1e <sup>-6</sup> ) | < .001*         | 1e <sup>-6</sup><br>(3e <sup>-7</sup> ) | < .001*                | 1e <sup>-6</sup> (3e <sup>-7</sup> ) | < .001*         |  |  |
| <b>Body height</b>          | -0.011<br>(0.013)                       | .38             | -0.010<br>(0.013)                       | 0.43            | 0.003<br>(0.006)                        | .62                    | 0.004<br>(0.006)                     | .55             |  |  |



|                               |                  |                  |                  |                  |
|-------------------------------|------------------|------------------|------------------|------------------|
| <b>Observations</b>           | 529              |                  |                  |                  |
| <b>R<sup>2</sup></b>          | 0.425            | 0.441            | 0.390            | 0.398            |
| <b>Adjusted R<sup>2</sup></b> | 0.418            | 0.431            | 0.383            | 0.387            |
| <b>Residual Std. Error</b>    | 1.744 (df = 522) | 1.724 (df = 519) | 0.854 (df = 522) | 0.851 (df = 519) |

| <b>(b) ODI regression models</b> |                                         |                |                                         |                |  |                                         |                |                                      |                |  |
|----------------------------------|-----------------------------------------|----------------|-----------------------------------------|----------------|--|-----------------------------------------|----------------|--------------------------------------|----------------|--|
|                                  | <b>WMH volume<sup>a</sup></b>           |                |                                         |                |  | <b>WMH count<sup>a</sup></b>            |                |                                      |                |  |
|                                  | <b>Null model</b>                       |                | <b>ODI model</b>                        |                |  | <b>Null model</b>                       |                | <b>ODI model</b>                     |                |  |
|                                  | <b>β (se)</b>                           | <b>p-value</b> | <b>β (se)</b>                           | <b>p-value</b> |  | <b>β (se)</b>                           | <b>p-value</b> | <b>β (se)</b>                        | <b>p-value</b> |  |
| <b>Constant</b>                  | -0.581<br>(2.438)                       | .81            | -0.805<br>(2.417)                       | .74            |  | -1.626<br>(1.194)                       | .18            | -1.695<br>(1.190)                    | .16            |  |
| <b>ODI</b>                       |                                         |                |                                         |                |  |                                         |                |                                      |                |  |
| mild OSA <sub>ODI</sub>          |                                         |                | 0.426<br>(0.237)                        | .07            |  |                                         |                | 0.141<br>(0.117)                     | .23            |  |
| moderate OSA <sub>ODI</sub>      |                                         |                | 1.030<br>(0.401)                        | .01*           |  |                                         |                | 0.315<br>(0.197)                     | .11            |  |
| severe OSA <sub>ODI</sub>        |                                         |                | 1.130<br>(0.499)                        | .02*           |  |                                         |                | 0.538<br>(0.246)                     | .03*           |  |
| <b>Sex</b>                       | -0.232<br>(0.227)                       | .31            | -0.091<br>(0.229)                       | .69            |  | -0.238<br>(0.111)                       | .03*           | -0.186<br>(0.113)                    | .10            |  |
| <b>r<sub>cs</sub> age</b>        | 0.089<br>(0.021)                        | < .001*        | 0.085<br>(0.021)                        | < .001*        |  | 0.047<br>(0.010)                        | < .001*        | 0.046<br>(0.010)                     | < .001*        |  |
| <b>r<sub>cs</sub> age'</b>       | 0.031<br>(0.045)                        | .50            | 0.029<br>(0.045)                        | .52            |  | 0.013<br>(0.022)                        | .56            | 0.012<br>(0.022)                     | .58            |  |
| <b>r<sub>cs</sub> age''</b>      | -0.112<br>(0.225)                       | .62            | -0.108<br>(0.223)                       | .63            |  | -0.105<br>(0.110)                       | .34            | -0.106<br>(0.110)                    | .34            |  |
| <b>ICV</b>                       | 3e <sup>-6</sup><br>(1e <sup>-6</sup> ) | < .001*        | 4e <sup>-6</sup><br>(1e <sup>-6</sup> ) | < .001*        |  | 1e <sup>-6</sup><br>(3e <sup>-7</sup> ) | < .001*        | 1e <sup>-6</sup> (3e <sup>-7</sup> ) | < .001*        |  |
| <b>Body height</b>               | -0.011<br>(0.013)                       | .38            | -0.010<br>(0.013)                       | .43            |  | 0.003<br>(0.006)                        | .62            | 0.003<br>(0.006)                     | .59            |  |
| <b>Observations</b>              | 529                                     |                |                                         |                |  |                                         |                |                                      |                |  |
| <b>R<sup>2</sup></b>             | 0.425                                   |                | 0.438                                   |                |  | 0.390                                   |                | 0.398                                |                |  |
| <b>Adjusted R<sup>2</sup></b>    | 0.418                                   |                | 0.429                                   |                |  | 0.383                                   |                | 0.388                                |                |  |
| <b>Residual Std. Error</b>       | 1.744 (df = 522)                        |                | 1.728 (df = 519)                        |                |  | 0.854 (df = 522)                        |                | 0.851 (df = 519)                     |                |  |

**Supplementary Table S5.** Results of the linear regression analysis for white matter hyperintensities (WMH) volume and count data with respect to obstructive sleep apnea (OSA) diagnostic criteria (a) apnea-hypopnea index (AHI) and (b) oxygen-desaturation index (ODI) after extending the respective OSA models by additional metabolic, vascular, and lifestyle covariates. For each new covariates model, the estimated effect sizes ( $\beta$ -coefficients), standard errors (se), and  $p$ -values of both the respective OSA parameter and the considered additional covariate are given. All models were adjusted for sex, age modelled by a restricted cubic spline, intracranial volume, and body height and are based on the complete study sample of 529 SHIP-Trend-0 study participants. Abbreviations: AHI, apnea-hypopnea index; ICV, intracranial volume; HDL, high-density lipoprotein; LDL, low-density lipoprotein; ODI, oxygen desaturation index; OSA, obstructive sleep apnea; rcs, restricted cubic spline; se, standard error. \* $P$ -value < .05; <sup>a</sup>WMH volume and count data have been log<sub>2</sub>-transformed after the addition of a pseudocount of 1.

| (a) AHI regression models  |                         |            |                   |            |                         |                        |            |                   |            |                         |
|----------------------------|-------------------------|------------|-------------------|------------|-------------------------|------------------------|------------|-------------------|------------|-------------------------|
|                            | WMH volume <sup>a</sup> |            |                   |            |                         | WMH count <sup>a</sup> |            |                   |            |                         |
|                            | AHI                     |            | covariate         |            | adjusted R <sup>2</sup> | AHI                    |            | covariate         |            | adjusted R <sup>2</sup> |
|                            | $\beta$ (se)            | $p$ -value | $\beta$ (se)      | $p$ -value |                         | $\beta$ (se)           | $p$ -value | $\beta$ (se)      | $p$ -value |                         |
| <b>OSA model</b>           | 0.024<br>(0.006)        | < .001*    |                   |            | 0.432                   | 0.008<br>(0.003)       | .01*       |                   |            | 0.389                   |
| <b>Hypertension</b>        | 0.023<br>(0.007)        | < .001*    | 0.103<br>(0.170)  | .55        | 0.431                   | 0.007<br>(0.003)       | .02*       | 0.073<br>(0.084)  | .38        | 0.388                   |
| <b>Waist circumference</b> | 0.024<br>(0.007)        | < .001*    | -0.001<br>(0.007) | .84        | 0.431                   | 0.008<br>(0.003)       | .01*       | -0.001<br>(0.004) | .69        | 0.388                   |
| <b>Triglycerides</b>       | 0.022<br>(0.007)        | .002*      | 0.128<br>(0.071)  | .07        | 0.434                   | 0.007<br>(0.003)       | .03*       | 0.054<br>(0.035)  | .12        | 0.390                   |
| <b>Total cholesterol</b>   | 0.024<br>(0.007)        | < .001*    | 0.062<br>(0.073)  | .40        | 0.431                   | 0.008<br>(0.003)       | .01*       | -0.033<br>(0.036) | .36        | 0.388                   |
| <b>LDL</b>                 | 0.024<br>(0.007)        | < .001*    | 0.054<br>(0.085)  | .53        | 0.431                   | 0.008<br>(0.003)       | .01*       | -0.037<br>(0.042) | .38        | 0.388                   |
| <b>HDL</b>                 | 0.024<br>(0.007)        | < .001*    | 0.023<br>(0.244)  | .93        | 0.431                   | 0.008<br>(0.003)       | .02*       | -0.074<br>(0.120) | .54        | 0.388                   |
| <b>Diabetes mellitus</b>   | 0.023<br>(0.006)        | < .001*    | 0.557<br>(0.256)  | .03*       | 0.436                   | 0.008<br>(0.003)       | .02*       | 0.185<br>(0.127)  | .15        | 0.390                   |
| <b>Smoking</b>             | 0.023<br>(0.007)        | < .001*    |                   |            | 0.431                   | 0.007<br>(0.003)       | .02*       |                   |            | 0.392                   |
| Ex-smoking                 |                         |            | 0.170<br>(0.170)  | .32        |                         |                        |            | 0.151<br>(0.084)  | .07        |                         |
| Current smoking            |                         |            | 0.227<br>(0.220)  | .30        |                         |                        |            | 0.199<br>(0.108)  | .07        |                         |
| <b>Depression</b>          | 0.024<br>(0.006)        | < .001*    | -0.129<br>(0.171) | .45        | 0.431                   | 0.008<br>(0.003)       | .01*       | -0.091<br>(0.084) | .28        | 0.389                   |
| <b>Alcohol</b>             | 0.024<br>(0.006)        | < .001*    | 0.012<br>(0.007)  | .09        | 0.434                   | 0.008<br>(0.003)       | .01*       | 0.005<br>(0.003)  | .16        | 0.390                   |
| <b>Education</b>           | 0.024<br>(0.007)        | < .001*    |                   |            | 0.431                   | 0.008<br>(0.003)       | .02*       |                   |            | 0.389                   |
| 10 years                   |                         |            | -0.193<br>(0.261) | .46        |                         |                        |            | -0.043<br>(0.129) | .74        |                         |

|                          |                  |         |                   |     |       |                  |      |                   |      |       |
|--------------------------|------------------|---------|-------------------|-----|-------|------------------|------|-------------------|------|-------|
| > 10 years               |                  |         | -0.326<br>(0.264) | .22 |       |                  |      | -0.142<br>(0.130) | .28  |       |
| <b>Mental health</b>     | 0.024<br>(0.006) | < .001* | -0.010<br>(0.009) | .27 | 0.432 | 0.008<br>(0.003) | .01* | -0.006<br>(0.005) | .15  | 0.390 |
| <b>Physical activity</b> | 0.024<br>(0.007) | < .001* | 0.114<br>(0.174)  | .51 | 0.431 | 0.008<br>(0.003) | .01* | 0.116<br>(0.086)  | .18  | 0.390 |
| <b>Full model</b>        | 0.022<br>(0.007) | .002*   |                   |     | 0.435 | 0.007<br>(0.003) | .04* |                   |      | 0.398 |
| Hypertension             |                  |         | 0.095<br>(0.180)  | .60 |       |                  |      | 0.071<br>(0.088)  | .43  |       |
| Waist circumference      |                  |         | -0.010<br>(0.009) | .26 |       |                  |      | -0.006<br>(0.004) | .17  |       |
| Triglycerides            |                  |         | 0.206<br>(0.118)  | .08 |       |                  |      | 0.115<br>(0.058)  | .05* |       |
| Total cholesterol        |                  |         | -0.287<br>(0.289) | .32 |       |                  |      | -0.214<br>(0.142) | .13  |       |
| LDL                      |                  |         | 0.354<br>(0.305)  | .25 |       |                  |      | 0.178<br>(0.150)  | .24  |       |
| HDL                      |                  |         | 0.412<br>(0.427)  | .34 |       |                  |      | 0.177<br>(0.210)  | .40  |       |
| Diabetes mellitus        |                  |         | 0.529<br>(0.270)  | .05 |       |                  |      | 0.145<br>(0.133)  | .27  |       |
| Smoking                  |                  |         |                   |     |       |                  |      |                   |      |       |
| Ex-smoking               |                  |         | 0.149<br>(0.171)  | .38 |       |                  |      | 0.137<br>(0.084)  | .10  |       |
| Current smoking          |                  |         | 0.149<br>(0.229)  | .52 |       |                  |      | 0.176<br>(0.113)  | .12  |       |
| Depression               |                  |         | -0.226<br>(0.181) | .21 |       |                  |      | -0.157<br>(0.089) | .08  |       |
| Alcohol                  |                  |         | 0.010<br>(0.007)  | .16 |       |                  |      | 0.004<br>(0.004)  | .26  |       |
| Education                |                  |         |                   |     |       |                  |      |                   |      |       |
| 10 years                 |                  |         | -0.121<br>(0.264) | .65 |       |                  |      | -0.030<br>(0.129) | .82  |       |
| > 10 years               |                  |         | -0.209<br>(0.272) | .44 |       |                  |      | -0.123<br>(0.133) | .36  |       |
| Mental health            |                  |         | -0.012<br>(0.010) | .21 |       |                  |      | -0.007<br>(0.005) | .13  |       |
| Physical activity        |                  |         | 0.131<br>(0.177)  | .46 |       |                  |      | 0.117<br>(0.087)  | .18  |       |

| (b) ODI regression models  |                         |         |                   |         |                         |                        |         |                   |         |                         |
|----------------------------|-------------------------|---------|-------------------|---------|-------------------------|------------------------|---------|-------------------|---------|-------------------------|
|                            | WMH volume <sup>a</sup> |         |                   |         |                         | WMH count <sup>a</sup> |         |                   |         |                         |
|                            | ODI                     |         | covariate         |         | adjusted R <sup>2</sup> | ODI                    |         | covariate         |         | adjusted R <sup>2</sup> |
|                            | $\beta$ (se)            | p-value | $\beta$ (se)      | p-value |                         | $\beta$ (se)           | p-value | $\beta$ (se)      | p-value |                         |
| <b>OSA model</b>           | 0.033<br>(0.009)        | .001*   |                   |         | 0.430                   | 0.011<br>(0.005)       | .02*    |                   |         | 0.388                   |
| <b>Hypertension</b>        | 0.032<br>(0.010)        | .001*   | 0.109<br>(0.170)  | .52     | 0.429                   | 0.010<br>(0.005)       | .03*    | 0.075<br>(0.084)  | .37     | 0.388                   |
| <b>Waist circumference</b> | 0.033<br>(0.010)        | .001*   | -0.001<br>(0.007) | .92     | 0.429                   | 0.011<br>(0.005)       | .02*    | -0.001<br>(0.004) | .73     | 0.387                   |
| <b>Triglycerides</b>       | 0.030<br>(0.009)        | .002*   | 0.140<br>(0.070)  | .05*    | 0.433                   | 0.010<br>(0.005)       | .04*    | 0.058<br>(0.035)  | .10     | 0.390                   |
| <b>Total cholesterol</b>   | 0.032<br>(0.009)        | .001*   | 0.072<br>(0.073)  | .33     | 0.430                   | 0.011<br>(0.005)       | .02*    | -0.030<br>(0.036) | .41     | 0.388                   |
| <b>LDL</b>                 | 0.032<br>(0.009)        | .001*   | 0.063<br>(0.085)  | .46     | 0.430                   | 0.011<br>(0.005)       | .02*    | -0.034<br>(0.042) | .42     | 0.388                   |
| <b>HDL</b>                 | 0.033<br>(0.010)        | .001*   | -0.002<br>(0.244) | .99     | 0.429                   | 0.011<br>(0.005)       | .03*    | -0.081<br>(0.120) | .50     | 0.387                   |
| <b>Diabetes mellitus</b>   | 0.030<br>(0.009)        | .002*   | 0.543<br>(0.257)  | .04*    | 0.434                   | 0.010<br>(0.005)       | .03*    | 0.179<br>(0.127)  | .16     | 0.389                   |
| <b>Smoking</b>             | 0.032<br>(0.009)        | .001*   |                   |         | 0.430                   | 0.010<br>(0.005)       | .03*    |                   |         | 0.392                   |
| Ex-smoking                 |                         |         | 0.187<br>(0.170)  | .27     |                         |                        |         | 0.156<br>(0.083)  | .06     |                         |
| Current smoking            |                         |         | 0.239<br>(0.220)  | .28     |                         |                        |         | 0.203<br>(0.108)  | .06     |                         |

|                          |                  |       |                   |     |       |                  |      |                   |      |       |
|--------------------------|------------------|-------|-------------------|-----|-------|------------------|------|-------------------|------|-------|
| <b>Depression</b>        | 0.032<br>(0.009) | .001* | -0.117<br>(0.171) | .50 | 0.429 | 0.011<br>(0.005) | .02* | -0.087<br>(0.084) | .30  | 0.388 |
| <b>Alcohol</b>           | 0.033<br>(0.009) | .001* | 0.011<br>(0.007)  | .12 | 0.432 | 0.011<br>(0.005) | .02* | 0.005<br>(0.003)  | .18  | 0.389 |
| <b>Education</b>         | 0.032<br>(0.009) | .001* |                   |     | 0.430 | 0.011<br>(0.005) | .02* |                   |      | 0.388 |
| 10 years                 |                  |       | -0.175<br>(0.261) | .51 |       |                  |      | -0.037<br>(0.129) | .78  |       |
| > 10 years               |                  |       | -0.328<br>(0.264) | .22 |       |                  |      | -0.142<br>(0.130) | .28  |       |
| <b>Mental health</b>     | 0.033<br>(0.009) | .001* | -0.010<br>(0.009) | .27 | 0.430 | 0.011<br>(0.005) | .02* | -0.007<br>(0.005) | .15  | 0.389 |
| <b>Physical activity</b> | 0.033<br>(0.009) | .001* | 0.117<br>(0.174)  | .50 | 0.429 | 0.012<br>(0.005) | .01* | 0.117<br>(0.086)  | .17  | 0.389 |
| <b>Full model</b>        | 0.030<br>(0.010) | .003* |                   |     | 0.433 | 0.010<br>(0.005) | .04* |                   |      | 0.398 |
| Hypertension             |                  |       | 0.093<br>(0.180)  | .61 |       |                  |      | 0.070<br>(0.088)  | .43  |       |
| Waist circumference      |                  |       | -0.009<br>(0.009) | .28 |       |                  |      | -0.006<br>(0.004) | .18  |       |
| Triglycerides            |                  |       | 0.217<br>(0.118)  | .07 |       |                  |      | 0.119<br>(0.058)  | .04* |       |
| Total cholesterol        |                  |       | -0.280<br>(0.289) | .33 |       |                  |      | -0.212<br>(0.142) | .14  |       |
| LDL                      |                  |       | 0.351<br>(0.306)  | .25 |       |                  |      | 0.176<br>(0.150)  | .24  |       |
| HDL                      |                  |       | 0.406<br>(0.428)  | .34 |       |                  |      | 0.174<br>(0.210)  | .41  |       |
| Diabetes mellitus        |                  |       | 0.509<br>(0.271)  | .06 |       |                  |      | 0.139<br>(0.133)  | .30  |       |
| Smoking                  |                  |       |                   |     |       |                  |      |                   |      |       |
| Ex-smoking               |                  |       | 0.167<br>(0.171)  | .33 |       |                  |      | 0.142<br>(0.084)  | .09  |       |
| Current smoking          |                  |       | 0.160<br>(0.230)  | .49 |       |                  |      | 0.179<br>(0.113)  | .11  |       |
| Depression               |                  |       | -0.216<br>(0.181) | .24 |       |                  |      | -0.154<br>(0.089) | .09  |       |
| Alcohol                  |                  |       | 0.009<br>(0.007)  | .20 |       |                  |      | 0.004<br>(0.004)  | .30  |       |
| Education                |                  |       |                   |     |       |                  |      |                   |      |       |
| 10 years                 |                  |       | -0.105<br>(0.264) | .69 |       |                  |      | -0.025<br>(0.129) | .85  |       |
| > 10 years               |                  |       | -0.211<br>(0.272) | .44 |       |                  |      | -0.123<br>(0.133) | .36  |       |
| Mental health            |                  |       | -0.012<br>(0.010) | .22 |       |                  |      | -0.007<br>(0.005) | .13  |       |
| Physical activity        |                  |       | 0.136<br>(0.177)  | .44 |       |                  |      | 0.119<br>(0.087)  | .17  |       |

**Supplementary Table S6.** Results of the linear regression analysis for white matter hyperintensities (WMH) volume and count data with respect to categorized obstructive sleep apnea diagnostic criteria (a) apnea-hypopnea index ( $OSA_{AHI}$ ) and (b) oxygen-desaturation index ( $OSA_{ODI}$ ) after extending the respective OSA models by additional metabolic, vascular, and lifestyle covariates. All models were adjusted for sex, age modelled by a restricted cubic spline, intracranial volume, and body height and are based on the complete study sample of 529 SHIP-Trend-0 study participants. For each new covariates model, the estimated effect sizes ( $\beta$ -coefficients), standard errors (se), and  $p$ -values of both the respective OSA parameter and the considered additional covariate are given. No OSA was considered as the reference category. Abbreviations: AHI, apnea-hypopnea index; ICV, intracranial volume; HDL, high-density lipoprotein; LDL, low-density lipoprotein; ODI, oxygen desaturation index; OSA, obstructive sleep apnea; rcs, restricted cubic spline; se, standard error. \* $P$ -value < 0.05; <sup>a</sup>WMH volume and count data have been  $\log_2$ -transformed after the addition of a pseudocount of 1.

| (a) AHI regression models  |                         |        |                             |        |                           |         |                   |         |                         |                         |         |                             |         |                           |         |                   |         |                         |
|----------------------------|-------------------------|--------|-----------------------------|--------|---------------------------|---------|-------------------|---------|-------------------------|-------------------------|---------|-----------------------------|---------|---------------------------|---------|-------------------|---------|-------------------------|
|                            | WMH volume <sup>a</sup> |        |                             |        |                           |         |                   |         |                         | WMH count <sup>a</sup>  |         |                             |         |                           |         |                   |         |                         |
|                            | AHI                     |        |                             |        |                           |         | covariate         |         | adjusted R <sup>2</sup> | AHI                     |         |                             |         |                           |         | covariate         |         | adjusted R <sup>2</sup> |
|                            | mild OSA <sub>AHI</sub> |        | moderate OSA <sub>AHI</sub> |        | severe OSA <sub>AHI</sub> |         | β (se)            | p-value |                         | mild OSA <sub>AHI</sub> |         | moderate OSA <sub>AHI</sub> |         | severe OSA <sub>AHI</sub> |         | β (se)            | p-value |                         |
| β (se)                     | p-value                 | β (se) | p-value                     | β (se) | p-value                   | β (se)  |                   |         | p-value                 | β (se)                  | p-value | β (se)                      | p-value | β (se)                    | p-value |                   |         | β (se)                  |
| <b>OSA model</b>           | 0.312<br>(0.197)        | .12    | 0.480<br>(0.270)            | .08    | 1.255<br>(0.341)          | < .001* |                   |         | 0.431                   | 0.129<br>(0.097)        | .18     | 0.107<br>(0.133)            | .42     | 0.419<br>(0.168)          | .01*    |                   |         | 0.387                   |
| <b>Hypertension</b>        | 0.305<br>(0.197)        | .12    | 0.458<br>(0.272)            | .09    | 1.232<br>(0.343)          | < .001* | 0.107<br>(0.170)  | .53     | 0.430                   | 0.125<br>(0.097)        | .20     | 0.091<br>(0.134)            | .50     | 0.402<br>(0.169)          | .02*    | 0.078<br>(0.084)  | .35     | 0.387                   |
| <b>Waist circumference</b> | 0.321<br>(0.200)        | .11    | 0.494<br>(0.276)            | .07    | 1.278<br>(0.353)          | < .001* | -0.002<br>(0.007) | .80     | 0.430                   | 0.137<br>(0.099)        | .17     | 0.119<br>(0.136)            | .38     | 0.438<br>(0.174)          | .01*    | -0.002<br>(0.004) | .68     | 0.386                   |
| <b>Triglycerides</b>       | 0.270<br>(0.198)        | .17    | 0.420<br>(0.271)            | .12    | 1.166<br>(0.344)          | .001*   | 0.130<br>(0.071)  | .07     | 0.434                   | 0.112<br>(0.098)        | .25     | 0.082<br>(0.134)            | .54     | 0.382<br>(0.170)          | .03*    | 0.055<br>(0.035)  | .12     | 0.389                   |
| <b>Total cholesterol</b>   | 0.313<br>(0.197)        | .11    | 0.462<br>(0.270)            | .09    | 1.249<br>(0.341)          | < .001* | 0.067<br>(0.073)  | .37     | 0.431                   | 0.129<br>(0.097)        | .19     | 0.116<br>(0.133)            | .39     | 0.422<br>(0.168)          | .01*    | -0.030<br>(0.036) | .40     | 0.387                   |
| <b>LDL</b>                 | 0.309<br>(0.197)        | .12    | 0.465<br>(0.271)            | .09    | 1.244<br>(0.342)          | < .001* | 0.055<br>(0.086)  | .52     | 0.430                   | 0.131<br>(0.097)        | .18     | 0.117<br>(0.134)            | .38     | 0.427<br>(0.169)          | .01*    | -0.036<br>(0.042) | .40     | 0.387                   |
| <b>HDL</b>                 | 0.319<br>(0.200)        | .11    | 0.489<br>(0.273)            | .07    | 1.265<br>(0.344)          | < .001* | 0.053<br>(0.247)  | .83     | 0.430                   | 0.120<br>(0.099)        | .22     | 0.096<br>(0.135)            | .48     | 0.407<br>(0.170)          | .02*    | -0.067<br>(0.122) | .59     | 0.386                   |
| <b>Diabetes mellitus</b>   | 0.265<br>(0.198)        | .18    | 0.431<br>(0.270)            | .11    | 1.193<br>(0.341)          | .001*   | 0.528<br>(0.258)  | .04*    | 0.435                   | 0.114<br>(0.098)        | .25     | 0.091<br>(0.133)            | .50     | 0.399<br>(0.169)          | .02*    | 0.174<br>(0.128)  | .17     | 0.388                   |
| <b>Smoking</b>             | 0.298<br>(0.198)        | .13    | 0.478<br>(0.270)            | .08    | 1.219<br>(0.343)          | < .001* |                   |         | 0.430                   | 0.117<br>(0.097)        | .23     | 0.105<br>(0.133)            | .43     | 0.386<br>(0.169)          | .02*    |                   |         | 0.390                   |
| Ex-smoking                 |                         |        |                             |        |                           |         | 0.160<br>(0.171)  | .35     |                         |                         |         |                             |         |                           |         | 0.146<br>(0.084)  | .08     |                         |
| Current smoking            |                         |        |                             |        |                           |         | 0.227<br>(0.221)  | .31     |                         |                         |         |                             |         |                           |         | 0.198<br>(0.109)  | .07     |                         |
| <b>Depression</b>          | 0.312<br>(0.197)        | .11    | 0.479<br>(0.270)            | .08    | 1.258<br>(0.341)          | < .001* | -0.132<br>(0.171) | .44     | 0.431                   | 0.130<br>(0.097)        | .18     | 0.107<br>(0.133)            | .42     | 0.421<br>(0.168)          | .01*    | -0.092<br>(0.084) | .28     | 0.387                   |
| <b>Alcohol</b>             | 0.312<br>(0.196)        | .11    | 0.497<br>(0.269)            | .07    | 1.273<br>(0.340)          | < .001* | 0.012<br>(0.007)  | .09     | 0.433                   | 0.129<br>(0.097)        | .18     | 0.114<br>(0.133)            | .39     | 0.426<br>(0.168)          | .01*    | 0.005<br>(0.003)  | .16     | 0.388                   |
| <b>Education</b>           | 0.294<br>(0.197)        | .14    | 0.477<br>(0.270)            | .08    | 1.236<br>(0.342)          | < .001* |                   |         | 0.431                   | 0.120<br>(0.097)        | .22     | 0.104<br>(0.133)            | .43     | 0.405<br>(0.169)          | .02*    |                   |         | 0.387                   |
| 10 years                   |                         |        |                             |        |                           |         | -0.188<br>(0.262) | .47     |                         |                         |         |                             |         |                           |         | -0.038<br>(0.129) | .77     |                         |
| > 10 years                 |                         |        |                             |        |                           |         | -0.328<br>(0.265) | .22     |                         |                         |         |                             |         |                           |         | -0.139<br>(0.131) | .29     |                         |
| <b>Mental health</b>       | 0.305<br>(0.197)        | .12    | 0.482<br>(0.269)            | .08    | 1.257<br>(0.341)          | < .001* | -0.010<br>(0.009) | .29     | 0.431                   | 0.125<br>(0.097)        | .20     | 0.109<br>(0.133)            | .42     | 0.421<br>(0.168)          | .01*    | -0.006<br>(0.005) | .17     | 0.388                   |
| <b>Physical activity</b>   | 0.320<br>(0.197)        | .11    | 0.487<br>(0.270)            | .07    | 1.270<br>(0.342)          | < .001* | 0.114<br>(0.174)  | .51     | 0.430                   | 0.138<br>(0.097)        | .16     | 0.115<br>(0.133)            | .39     | 0.435<br>(0.169)          | .01*    | 0.116<br>(0.086)  | .18     | 0.388                   |
| <b>Full model</b>          | 0.255<br>(0.203)        | .21    | 0.465<br>(0.279)            | .10    | 1.170<br>(0.357)          | .002*   |                   |         | 0.434                   | 0.101<br>(0.100)        | .31     | 0.118<br>(0.137)            | .39     | 0.373<br>(0.175)          | .03*    |                   |         | 0.396                   |

|                     |  |  |  |  |  |  |                   |     |  |  |  |  |  |  |  |                   |      |  |
|---------------------|--|--|--|--|--|--|-------------------|-----|--|--|--|--|--|--|--|-------------------|------|--|
| Hypertension        |  |  |  |  |  |  | 0.100<br>(0.180)  | .58 |  |  |  |  |  |  |  | 0.074<br>(0.088)  | .40  |  |
| Waist circumference |  |  |  |  |  |  | -0.010<br>(0.009) | .25 |  |  |  |  |  |  |  | -0.006<br>(0.004) | .17  |  |
| Triglycerides       |  |  |  |  |  |  | 0.216<br>(0.118)  | .07 |  |  |  |  |  |  |  | 0.118<br>(0.058)  | .04* |  |
| Total cholesterol   |  |  |  |  |  |  | -0.296<br>(0.290) | .31 |  |  |  |  |  |  |  | -0.215<br>(0.143) | .13  |  |
| LDL                 |  |  |  |  |  |  | 0.360<br>(0.307)  | .24 |  |  |  |  |  |  |  | 0.178<br>(0.151)  | .24  |  |
| HDL                 |  |  |  |  |  |  | 0.454<br>(0.431)  | .29 |  |  |  |  |  |  |  | 0.189<br>(0.212)  | .37  |  |
| Diabetes mellitus   |  |  |  |  |  |  | 0.493<br>(0.272)  | .07 |  |  |  |  |  |  |  | 0.134<br>(0.133)  | .32  |  |
| Smoking             |  |  |  |  |  |  |                   |     |  |  |  |  |  |  |  |                   |      |  |
| Ex-smoking          |  |  |  |  |  |  | 0.141<br>(0.171)  | .41 |  |  |  |  |  |  |  | 0.133<br>(0.084)  | .12  |  |
| Current smoking     |  |  |  |  |  |  | 0.149<br>(0.230)  | .52 |  |  |  |  |  |  |  | 0.176<br>(0.113)  | .12  |  |
| Depression          |  |  |  |  |  |  | -0.228<br>(0.181) | .21 |  |  |  |  |  |  |  | -0.158<br>(0.089) | .08  |  |
| Alcohol             |  |  |  |  |  |  | 0.010<br>(0.007)  | .16 |  |  |  |  |  |  |  | 0.004<br>(0.004)  | .27  |  |
| Education           |  |  |  |  |  |  |                   |     |  |  |  |  |  |  |  |                   |      |  |
| 10 years            |  |  |  |  |  |  | -0.121<br>(0.264) | .65 |  |  |  |  |  |  |  | -0.028<br>(0.130) | .83  |  |
| > 10 years          |  |  |  |  |  |  | -0.219<br>(0.272) | .42 |  |  |  |  |  |  |  | -0.124<br>(0.134) | .36  |  |
| Mental health       |  |  |  |  |  |  | -0.012<br>(0.010) | .22 |  |  |  |  |  |  |  | -0.007<br>(0.005) | .14  |  |
| Physical activity   |  |  |  |  |  |  | 0.129<br>(0.177)  | .47 |  |  |  |  |  |  |  | 0.117<br>(0.087)  | .18  |  |

| (b) ODI regression models |                         |         |                             |         |                           |         |                  |         |       |                         |         |                             |         |                           |         |                  |           |       |                         |
|---------------------------|-------------------------|---------|-----------------------------|---------|---------------------------|---------|------------------|---------|-------|-------------------------|---------|-----------------------------|---------|---------------------------|---------|------------------|-----------|-------|-------------------------|
|                           | WMH volume <sup>a</sup> |         |                             |         |                           |         |                  |         |       | WMH count <sup>a</sup>  |         |                             |         |                           |         |                  |           |       |                         |
|                           | ODI                     |         |                             |         |                           |         | covariate        |         |       | adjusted R <sup>2</sup> | ODI     |                             |         |                           |         |                  | covariate |       | adjusted R <sup>2</sup> |
|                           | mild OSA <sub>ODI</sub> |         | moderate OSA <sub>ODI</sub> |         | severe OSA <sub>ODI</sub> |         | $\beta$ (se)     | p-value |       | mild OSA <sub>ODI</sub> |         | moderate OSA <sub>ODI</sub> |         | severe OSA <sub>ODI</sub> |         | $\beta$ (se)     | p-value   |       |                         |
|                           | $\beta$ (se)            | p-value | $\beta$ (se)                | p-value | $\beta$ (se)              | p-value |                  |         |       | $\beta$ (se)            | p-value | $\beta$ (se)                | p-value | $\beta$ (se)              | p-value |                  |           |       |                         |
| <b>OSA model</b>          | 0.426<br>(0.237)        | .07     | 1.030<br>(0.401)            | .01*    | 1.130<br>(0.499)          | .02*    |                  |         | 0.429 | 0.141<br>(0.117)        | .23     | 0.315<br>(0.197)            | .11     | 0.538<br>(0.246)          | .03*    |                  |           | 0.388 |                         |
| <b>Hypertension</b>       | 0.408<br>(0.239)        | .09     | 1.011<br>(0.402)            | .01*    | 1.100<br>(0.501)          | .03*    | 0.112<br>(0.170) | .51     | 0.428 | 0.129<br>(0.118)        | .27     | 0.303<br>(0.198)            | .13     | 0.519<br>(0.247)          | .04*    | 0.073<br>(0.084) | .39       | 0.388 |                         |

|                            |                  |     |                  |      |                  |      |                   |      |       |                  |     |                  |     |                  |      |                   |      |       |
|----------------------------|------------------|-----|------------------|------|------------------|------|-------------------|------|-------|------------------|-----|------------------|-----|------------------|------|-------------------|------|-------|
| <b>Waist circumference</b> | 0.437<br>(0.243) | .07 | 1.048<br>(0.409) | .01* | 1.153<br>(0.510) | .03* | -0.002<br>(0.008) | .83  | 0.428 | 0.154<br>(0.119) | .20 | 0.336<br>(0.201) | .10 | 0.565<br>(0.251) | .03* | -0.002<br>(0.004) | .60  | 0.387 |
| <b>Triglycerides</b>       | 0.407<br>(0.237) | .09 | 0.974<br>(0.401) | .02* | 0.999<br>(0.502) | .05* | 0.141<br>(0.070)  | .05* | 0.432 | 0.134<br>(0.117) | .25 | 0.293<br>(0.198) | .14 | 0.487<br>(0.247) | .05  | 0.056<br>(0.035)  | .11  | 0.390 |
| <b>Total cholesterol</b>   | 0.422<br>(0.238) | .08 | 1.014<br>(0.401) | .01* | 1.134<br>(0.499) | .02* | 0.069<br>(0.073)  | .35  | 0.428 | 0.143<br>(0.117) | .22 | 0.322<br>(0.198) | .10 | 0.536<br>(0.246) | .03* | -0.030<br>(0.036) | .40  | 0.388 |
| <b>LDL</b>                 | 0.420<br>(0.238) | .08 | 1.011<br>(0.402) | .01* | 1.132<br>(0.499) | .02* | 0.062<br>(0.086)  | .47  | 0.428 | 0.145<br>(0.117) | .22 | 0.326<br>(0.198) | .10 | 0.537<br>(0.246) | .03* | -0.034<br>(0.042) | .43  | 0.388 |
| <b>HDL</b>                 | 0.425<br>(0.238) | .08 | 1.028<br>(0.402) | .01* | 1.128<br>(0.500) | .03* | -0.020<br>(0.244) | .94  | 0.428 | 0.135<br>(0.117) | .25 | 0.305<br>(0.198) | .13 | 0.529<br>(0.246) | .03* | -0.085<br>(0.120) | .48  | 0.387 |
| <b>Diabetes mellitus</b>   | 0.371<br>(0.238) | .12 | 1.027<br>(0.400) | .01* | 0.952<br>(0.505) | .06  | 0.523<br>(0.261)  | .05* | 0.432 | 0.125<br>(0.118) | .29 | 0.314<br>(0.197) | .11 | 0.484<br>(0.249) | .05  | 0.159<br>(0.129)  | .22  | 0.389 |
| <b>Smoking</b>             | 0.412<br>(0.238) | .09 | 1.014<br>(0.402) | .01* | 1.085<br>(0.500) | .03* |                   |      | 0.428 | 0.129<br>(0.117) | .27 | 0.301<br>(0.197) | .13 | 0.500<br>(0.246) | .04* |                   |      | 0.391 |
| Ex-smoking                 |                  |     |                  |      |                  |      | 0.172<br>(0.171)  | .32  |       |                  |     |                  |     |                  |      | 0.150<br>(0.084)  | .08  |       |
| Current smoking            |                  |     |                  |      |                  |      | 0.233<br>(0.221)  | .29  |       |                  |     |                  |     |                  |      | 0.197<br>(0.108)  | .07  |       |
| <b>Depression</b>          | 0.427<br>(0.238) | .07 | 1.016<br>(0.402) | .01* | 1.132<br>(0.499) | .02* | -0.108<br>(0.171) | .53  | 0.428 | 0.142<br>(0.117) | .23 | 0.303<br>(0.198) | .13 | 0.540<br>(0.246) | .03* | -0.085<br>(0.084) | .31  | 0.388 |
| <b>Alcohol</b>             | 0.416<br>(0.237) | .08 | 1.029<br>(0.401) | .01* | 1.107<br>(0.499) | .03* | 0.010<br>(0.007)  | .14  | 0.430 | 0.137<br>(0.117) | .24 | 0.315<br>(0.197) | .11 | 0.529<br>(0.246) | .03* | 0.004<br>(0.003)  | .22  | 0.389 |
| <b>Education</b>           | 0.407<br>(0.238) | .09 | 1.007<br>(0.404) | .01* | 1.107<br>(0.502) | .03* |                   |      | 0.428 | 0.130<br>(0.117) | .27 | 0.309<br>(0.199) | .12 | 0.519<br>(0.247) | .04* |                   |      | 0.388 |
| 10 years                   |                  |     |                  |      |                  |      | -0.134<br>(0.264) | .61  |       |                  |     |                  |     |                  |      | -0.031<br>(0.130) | .81  |       |
| > 10 years                 |                  |     |                  |      |                  |      | -0.292<br>(0.266) | .27  |       |                  |     |                  |     |                  |      | -0.134<br>(0.131) | .31  |       |
| <b>Mental health</b>       | 0.402<br>(0.239) | .09 | 1.045<br>(0.401) | .01* | 1.140<br>(0.499) | .02* | -0.010<br>(0.009) | .30  | 0.429 | 0.125<br>(0.117) | .29 | 0.325<br>(0.197) | .10 | 0.545<br>(0.245) | .03* | -0.006<br>(0.005) | .16  | 0.389 |
| <b>Physical activity</b>   | 0.435<br>(0.238) | .07 | 1.051<br>(0.402) | .01* | 1.151<br>(0.500) | .02* | 0.124<br>(0.175)  | .48  | 0.428 | 0.150<br>(0.117) | .20 | 0.335<br>(0.198) | .09 | 0.559<br>(0.246) | .02* | 0.121<br>(0.086)  | .16  | 0.389 |
| <b>Full model</b>          | 0.348<br>(0.246) | .16 | 1.017<br>(0.414) | .02* | 0.870<br>(0.521) | .10  |                   |      | 0.431 | 0.114<br>(0.120) | .35 | 0.329<br>(0.203) | .11 | 0.435<br>(0.255) | .09  |                   |      | 0.397 |
| Hypertension               |                  |     |                  |      |                  |      | 0.101<br>(0.180)  | .58  |       |                  |     |                  |     |                  |      | 0.072<br>(0.088)  | .42  |       |
| Waist circumference        |                  |     |                  |      |                  |      | -0.010<br>(0.009) | .25  |       |                  |     |                  |     |                  |      | -0.006<br>(0.004) | .15  |       |
| Triglycerides              |                  |     |                  |      |                  |      | 0.226<br>(0.119)  | .06  |       |                  |     |                  |     |                  |      | 0.118<br>(0.058)  | .04* |       |
| Total cholesterol          |                  |     |                  |      |                  |      | -0.299<br>(0.290) | .31  |       |                  |     |                  |     |                  |      | -0.211<br>(0.142) | .14  |       |
| LDL                        |                  |     |                  |      |                  |      | 0.367<br>(0.307)  | .23  |       |                  |     |                  |     |                  |      | 0.175<br>(0.150)  | .24  |       |



|                      |  |  |  |  |  |  |                   |     |  |  |  |  |  |  |  |                   |     |  |
|----------------------|--|--|--|--|--|--|-------------------|-----|--|--|--|--|--|--|--|-------------------|-----|--|
| HDL                  |  |  |  |  |  |  | 0.407<br>(0.430)  | .35 |  |  |  |  |  |  |  | 0.164<br>(0.211)  | .44 |  |
| Diabetes<br>mellitus |  |  |  |  |  |  | 0.502<br>(0.274)  | .07 |  |  |  |  |  |  |  | 0.127<br>(0.134)  | .35 |  |
| Smoking              |  |  |  |  |  |  |                   |     |  |  |  |  |  |  |  |                   |     |  |
| Ex-smoking           |  |  |  |  |  |  | 0.156<br>(0.171)  | .36 |  |  |  |  |  |  |  | 0.137<br>(0.084)  | .10 |  |
| Current<br>smoking   |  |  |  |  |  |  | 0.158<br>(0.230)  | .49 |  |  |  |  |  |  |  | 0.175<br>(0.113)  | .12 |  |
| Depression           |  |  |  |  |  |  | -0.201<br>(0.182) | .27 |  |  |  |  |  |  |  | -0.150<br>(0.089) | .09 |  |
| Alcohol              |  |  |  |  |  |  | 0.009<br>(0.007)  | .23 |  |  |  |  |  |  |  | 0.004<br>(0.004)  | .32 |  |
| Education            |  |  |  |  |  |  |                   |     |  |  |  |  |  |  |  |                   |     |  |
| 10 years             |  |  |  |  |  |  | -0.057<br>(0.267) | .83 |  |  |  |  |  |  |  | -0.017<br>(0.131) | .90 |  |
| > 10 years           |  |  |  |  |  |  | -0.176<br>(0.274) | .52 |  |  |  |  |  |  |  | -0.117<br>(0.134) | .39 |  |
| Mental health        |  |  |  |  |  |  | -0.011<br>(0.010) | .25 |  |  |  |  |  |  |  | -0.007<br>(0.005) | .14 |  |
| Physical<br>activity |  |  |  |  |  |  | 0.139<br>(0.177)  | .44 |  |  |  |  |  |  |  | 0.121<br>(0.087)  | .16 |  |

**Supplementary Table S7.** Results of the linear regression analysis for white matter hyperintensity (WMH) volumes and counts with respect to an interaction term between obstructive sleep apnea diagnostic criteria and different metabolic, vascular, and lifestyle risk factors, which were tested separately in individual regression models. All models were adjusted for sex, age modelled by a restricted cubic spline, intracranial volume, and body height and are based on the complete study sample of 529 SHIP-Trend-0 study participants. Abbreviations: AHI, apnea-hypopnea index; HDL, high-density lipoprotein; ICV, intracranial volume; LDL, low-density lipoprotein; ODI, oxygen desaturation index; rcs, restricted cubic spline; se, standard error. \* $P$ -value < 0.05; <sup>a</sup>WMH volume and count data have been  $\log_2$ -transformed after the addition of a pseudocount of 1.

| (a) AHI regression models       |                         |         |                |         |                |         |                         |                        |         |                |         |                  |         |                         |
|---------------------------------|-------------------------|---------|----------------|---------|----------------|---------|-------------------------|------------------------|---------|----------------|---------|------------------|---------|-------------------------|
|                                 | WMH volume <sup>a</sup> |         |                |         |                |         |                         | WMH count <sup>a</sup> |         |                |         |                  |         |                         |
|                                 | AHI                     |         | covariate      |         | AHI*covariate  |         | adjusted R <sup>2</sup> | AHI                    |         | covariate      |         | AHI*covariate    |         | adjusted R <sup>2</sup> |
|                                 | $\beta$ (se)            | p-value | $\beta$ (se)   | p-value | $\beta$ (se)   | p-value |                         | $\beta$ (se)           | p-value | $\beta$ (se)   | p-value | $\beta$ (se)     | p-value |                         |
| <b>OSA model</b>                | 0.024 (0.006)           | < .001* |                |         |                |         | 0.432                   | 0.008 (0.003)          | .01*    |                |         |                  |         | 0.389                   |
| <b>Hypertension</b>             | 0.026 (0.014)           | .06     | 0.126 (0.202)  | .53     | -0.003 (0.015) | .83     | 0.430                   | 0.009 (0.007)          | .20     | 0.085 (0.099)  | .40     | -0.002 (0.008)   | .83     | 0.387                   |
| <b>Waist circumference</b>      | -0.033 (0.059)          | .58     | -0.005 (0.008) | .54     | 0.001 (0.001)  | .33     | 0.431                   | -0.035 (0.029)         | .23     | -0.004 (0.004) | .30     | 0.0004 (0.0003)  | .14     | 0.389                   |
| <b>Triglycerides</b>            | 0.020 (0.009)           | .02*    | 0.111 (0.090)  | .22     | 0.001 (0.003)  | .76     | 0.433                   | 0.004 (0.004)          | .31     | 0.028 (0.044)  | .52     | 0.001 (0.001)    | .35     | 0.390                   |
| <b>Total cholesterol</b>        | 0.006 (0.033)           | .86     | 0.038 (0.086)  | .66     | 0.003 (0.006)  | .58     | 0.431                   | 0.009 (0.016)          | .58     | -0.032 (0.042) | .45     | -0.0002 (0.003)  | .95     | 0.387                   |
| <b>LDL</b>                      | 0.009 (0.029)           | .74     | 0.028 (0.100)  | .78     | 0.004 (0.008)  | .61     | 0.430                   | 0.025 (0.014)          | .08     | -0.007 (0.049) | .90     | -0.004 (0.004)   | .23     | 0.389                   |
| <b>HDL</b>                      | 0.038 (0.024)           | .12     | 0.088 (0.267)  | .74     | -0.011 (0.018) | .55     | 0.430                   | 0.007 (0.012)          | .53     | -0.074 (0.132) | .57     | 0.0001 (0.009)   | .99     | 0.387                   |
| <b>Diabetes mellitus</b>        | 0.018 (0.007)           | .01*    | 0.208 (0.336)  | .54     | 0.027 (0.017)  | .11     | 0.438                   | 0.005 (0.003)          | .15     | -0.012 (0.166) | .94     | 0.015 (0.008)    | .07     | 0.393                   |
| <b>Smoking</b>                  | 0.025 (0.011)           | .02*    |                |         |                |         | 0.430                   | 0.005 (0.005)          | .40     |                |         |                  |         | 0.393                   |
| Ex-smoking                      |                         |         | 0.232 (0.202)  | .25     | -0.007 (0.014) | .63     |                         |                        |         | 0.156 (0.099)  | .12     | 0.001 (0.007)    | .93     |                         |
| Current smoking                 |                         |         | 0.165 (0.251)  | .51     | 0.009 (0.018)  | .62     |                         |                        |         | 0.106 (0.123)  | .39     | 0.014 (0.009)    | .12     |                         |
| <b>Lifetime Depression</b>      | 0.025 (0.007)           | .001*   | -0.100 (0.199) | .62     | -0.004 (0.014) | .78     | 0.430                   | 0.006 (0.004)          | .09     | -0.144 (0.098) | .14     | 0.007 (0.007)    | .29     | 0.389                   |
| <b>Alcohol</b>                  | 0.015 (0.009)           | .10     | 0.004 (0.008)  | .62     | 0.001 (0.001)  | .10     | 0.436                   | 0.005 (0.004)          | .25     | 0.002 (0.004)  | .56     | 0.0003 (0.0003)  | .29     | 0.390                   |
| <b>Education</b>                | 0.042 (0.016)           | .01*    |                |         |                |         | 0.431                   | 0.012 (0.008)          | .14     |                |         |                  |         | 0.387                   |
| 10 years                        |                         |         | 0.038 (0.324)  | .91     | -0.022 (0.018) | .24     |                         |                        |         | 0.025 (0.160)  | .88     | -0.007 (0.009)   | .46     |                         |
| > 10 years                      |                         |         | -0.093 (0.329) | .78     | -0.023 (0.020) | .26     |                         |                        |         | -0.109 (0.162) | .50     | -0.002 (0.010)   | .85     |                         |
| <b>Subjective Mental health</b> | 0.009 (0.054)           | .87     | -0.012 (0.011) | .29     | 0.0003 (0.001) | .77     | 0.431                   | 0.014 (0.026)          | .61     | -0.006 (0.006) | .30     | -0.0001 (0.0005) | .83     | 0.389                   |
| <b>Physical activity</b>        | 0.039 (0.010)           | < .001* | 0.320 (0.205)  | .12     | -0.024 (0.013) | .06     | 0.434                   | 0.013 (0.005)          | .01*    | 0.179 (0.101)  | .08     | -0.007 (0.006)   | .24     | 0.390                   |

| <b>(b) ODI regression models</b> |                                |                |                                |                |                                |                |                               |                                |                |                                |                |                                |                |                               |
|----------------------------------|--------------------------------|----------------|--------------------------------|----------------|--------------------------------|----------------|-------------------------------|--------------------------------|----------------|--------------------------------|----------------|--------------------------------|----------------|-------------------------------|
|                                  | <b>WMH volume<sup>a</sup></b>  |                |                                |                |                                |                |                               | <b>WMH count<sup>a</sup></b>   |                |                                |                |                                |                |                               |
|                                  | <b>ODI</b>                     |                | <b>covariate</b>               |                | <b>ODI*covariate</b>           |                | <b>adjusted R<sup>2</sup></b> | <b>ODI</b>                     |                | <b>covariate</b>               |                | <b>ODI*covariate</b>           |                | <b>adjusted R<sup>2</sup></b> |
|                                  | <b><math>\beta</math> (se)</b> | <b>p-value</b> | <b><math>\beta</math> (se)</b> | <b>p-value</b> | <b><math>\beta</math> (se)</b> | <b>p-value</b> |                               | <b><math>\beta</math> (se)</b> | <b>p-value</b> | <b><math>\beta</math> (se)</b> | <b>p-value</b> | <b><math>\beta</math> (se)</b> | <b>p-value</b> |                               |
| <b>OSA model</b>                 | 0.033 (0.009)                  | .001*          |                                |                |                                |                | 0.430                         | 0.011 (0.005)                  | .02*           |                                |                |                                |                | 0.388                         |
| <b>Hypertension</b>              | 0.043 (0.023)                  | .06            | 0.149 (0.185)                  | .42            | -0.014 (0.025)                 | .58            | 0.429                         | 0.017 (0.011)                  | .15            | 0.096 (0.091)                  | .29            | -0.007 (0.012)                 | .55            | 0.387                         |
| <b>Waist circumference</b>       | -0.027 (0.097)                 | .78            | -0.002 (0.008)                 | .78            | 0.001 (0.001)                  | .54            | 0.428                         | -0.047 (0.048)                 | .33            | -0.003 (0.004)                 | .48            | 0.001 (0.0005)                 | .22            | 0.388                         |
| <b>Triglycerides</b>             | 0.029 (0.013)                  | .03*           | 0.134 (0.085)                  | .12            | 0.001 (0.004)                  | .90            | 0.432                         | 0.006 (0.006)                  | .36            | 0.035 (0.042)                  | .41            | 0.002 (0.002)                  | .33            | 0.390                         |
| <b>Total cholesterol</b>         | 0.004 (0.056)                  | .94            | 0.055 (0.081)                  | .50            | 0.005 (0.010)                  | .61            | 0.429                         | 0.013 (0.028)                  | .64            | -0.029 (0.040)                 | .47            | -0.0003 (0.005)                | .94            | 0.387                         |
| <b>LDL</b>                       | 0.038 (0.049)                  | .44            | 0.067 (0.093)                  | .47            | -0.001 (0.013)                 | .91            | 0.428                         | 0.051 (0.024)                  | .03*           | -0.003 (0.046)                 | .96            | -0.011 (0.006)                 | .09            | 0.390                         |
| <b>HDL</b>                       | 0.018 (0.037)                  | .62            | -0.030 (0.254)                 | .91            | 0.012 (0.029)                  | .69            | 0.428                         | 0.001 (0.018)                  | .94            | -0.098 (0.125)                 | .43            | 0.007 (0.014)                  | .61            | 0.387                         |
| <b>Diabetes mellitus</b>         | 0.027 (0.010)                  | .01*           | 0.398 (0.306)                  | .20            | 0.020 (0.023)                  | .39            | 0.434                         | 0.007 (0.005)                  | .16            | 0.066 (0.151)                  | .67            | 0.016 (0.012)                  | .17            | 0.390                         |
| <b>Smoking</b>                   | 0.028 (0.016)                  | .08            |                                |                |                                |                | 0.428                         | 0.002 (0.008)                  | .81            |                                |                |                                |                | 0.395                         |
| Ex-smoking                       |                                |                | 0.188 (0.186)                  | .31            | 0.001 (0.020)                  | .94            |                               |                                |                | 0.138 (0.091)                  | .13            | 0.007 (0.010)                  | .46            |                               |
| Current smoking                  |                                |                | 0.178 (0.236)                  | .45            | 0.020 (0.027)                  | .47            |                               |                                |                | 0.110 (0.115)                  | .34            | 0.030 (0.013)                  | .03*           |                               |
| <b>Lifetime Depression</b>       | 0.031 (0.010)                  | .003*          | -0.148 (0.186)                 | .43            | 0.010 (0.024)                  | .68            | 0.429                         | 0.008 (0.005)                  | .13            | -0.147 (0.092)                 | .11            | 0.019 (0.012)                  | .10            | 0.390                         |
| <b>Alcohol</b>                   | 0.016 (0.013)                  | .21            | 0.004 (0.008)                  | .57            | 0.002 (0.001)                  | .07            | 0.434                         | 0.006 (0.006)                  | .32            | 0.003 (0.004)                  | .47            | 0.0004 (0.0004)                | .32            | 0.389                         |
| <b>Education</b>                 | 0.056 (0.023)                  | .02*           |                                |                |                                |                | 0.429                         | 0.016 (0.012)                  | .17            |                                |                |                                |                | 0.386                         |
| 10 years                         |                                |                | -0.032 (0.296)                 | .91            | -0.025 (0.026)                 | .34            |                               |                                |                | 0.002 (0.146)                  | .99            | -0.008 (0.013)                 | .56            |                               |
| > 10 years                       |                                |                | -0.160 (0.300)                 | .59            | -0.034 (0.029)                 | .24            |                               |                                |                | -0.117 (0.148)                 | .43            | -0.004 (0.014)                 | .78            |                               |
| <b>Subjective Mental health</b>  | -0.052 (0.080)                 | .52            | -0.015 (0.010)                 | .14            | 0.001 (0.001)                  | .29            | 0.430                         | 0.012 (0.039)                  | .76            | -0.006 (0.005)                 | .20            | -0.00001 (0.001)               | .98            | 0.388                         |
| <b>Physical activity</b>         | 0.053 (0.014)                  | < .001*        | 0.255 (0.190)                  | .18            | -0.033 (0.018)                 | .07            | 0.432                         | 0.017 (0.007)                  | .02*           | 0.156 (0.094)                  | .10            | -0.009 (0.009)                 | .30            | 0.389                         |

**Supplementary Table S8.** Results of the linear regression analysis for periventricular frontal and periventricular dorsal white matter hyperintensity (WMH) volumes with respect to obstructive sleep apnea (OSA) diagnostic criteria (a) apnea-hypopnea index (AHI) and (b) oxygen-desaturation index (ODI) after extending the respective OSA models by additional metabolic, vascular, and lifestyle covariates. For each new covariates model, the estimated effect sizes ( $\beta$ -coefficients), standard errors (se), and  $p$ -values of both the respective OSA parameter and the considered additional covariate are given. All models were adjusted for sex, age modelled by a restricted cubic spline, intracranial volume, and body height and are based on a subsample of 392 SHIP-Trend-0 study participants. Abbreviations: AHI, apnea-hypopnea index; ICV, intracranial volume; HDL, high-density lipoprotein; LDL, low-density lipoprotein; ODI, oxygen desaturation index; OSA, obstructive sleep apnea; rcs, restricted cubic spline; se, standard error. \* $P$ -value < 0.0125; <sup>a</sup>Regional WMH volumes have been log<sub>2</sub>-transformed after the addition of a pseudocount of 1.

| (a) AHI regression models  |                                                 |            |                   |            |                         |                                                |            |                        |            |                         |
|----------------------------|-------------------------------------------------|------------|-------------------|------------|-------------------------|------------------------------------------------|------------|------------------------|------------|-------------------------|
|                            | Periventricular frontal WMH volume <sup>a</sup> |            |                   |            |                         | Periventricular dorsal WMH volume <sup>a</sup> |            |                        |            |                         |
|                            | AHI                                             |            | covariate         |            | adjusted R <sup>2</sup> | AHI                                            |            | covariate              |            | adjusted R <sup>2</sup> |
|                            | $\beta$ (se)                                    | $p$ -value | $\beta$ (se)      | $p$ -value |                         | $\beta$ (se)                                   | $p$ -value | $\beta$ (se)           | $p$ -value |                         |
| <b>OSA model</b>           | 0.027<br>(0.007)                                | < .001*    |                   |            | 0.417                   | 0.016<br>(0.006)                               | .009*      |                        |            | 0.196                   |
| <b>Hypertension</b>        | 0.027<br>(0.008)                                | < .001*    | 0.064<br>(0.173)  | .71        | 0.416                   | 0.016<br>(0.006)                               | .01*       | 0.167<br>(0.143)       | .24        | 0.197                   |
| <b>Waist circumference</b> | 0.027<br>(0.008)                                | < .001*    | 0.001<br>(0.008)  | .93        | 0.415                   | 0.016<br>(0.006)                               | .01        | -<br>0.0001<br>(0.006) | .99        | 0.194                   |
| <b>Triglycerides</b>       | 0.023<br>(0.008)                                | .003*      | 0.217<br>(0.069)  | .002*      | 0.430                   | 0.013<br>(0.006)                               | .03        | 0.143<br>(0.057)       | .01        | 0.207                   |
| <b>Total cholesterol</b>   | 0.027<br>(0.007)                                | < .001*    | 0.186<br>(0.075)  | .02        | 0.425                   | 0.016<br>(0.006)                               | .01*       | 0.061<br>(0.063)       | .33        | 0.196                   |
| <b>LDL</b>                 | 0.027<br>(0.007)                                | < .001*    | 0.190<br>(0.088)  | .03        | 0.423                   | 0.016<br>(0.006)                               | .01*       | 0.036<br>(0.073)       | .62        | 0.195                   |
| <b>HDL</b>                 | 0.026<br>(0.008)                                | .001*      | -0.323<br>(0.248) | .19        | 0.418                   | 0.015<br>(0.006)                               | .02        | -0.216<br>(0.205)      | .29        | 0.197                   |
| <b>Diabetes mellitus</b>   | 0.024<br>(0.007)                                | .002*      | 1.000<br>(0.275)  | < .001*    | 0.435                   | 0.015<br>(0.006)                               | .02        | 0.448<br>(0.230)       | .05        | 0.202                   |
| <b>Smoking</b>             | 0.027<br>(0.008)                                | < .001*    |                   |            | 0.415                   | 0.016<br>(0.006)                               | .01*       |                        |            | 0.201                   |
| Ex-smoking                 |                                                 |            | -0.113<br>(0.173) | .51        |                         |                                                |            | 0.189<br>(0.142)       | .19        |                         |
| Current smoking            |                                                 |            | 0.066<br>(0.224)  | .77        |                         |                                                |            | 0.354<br>(0.184)       | .06        |                         |
| <b>Depression</b>          | 0.027<br>(0.007)                                | < .001*    | 0.194<br>(0.175)  | .27        | 0.417                   | 0.016<br>(0.006)                               | .009*      | 0.150<br>(0.144)       | .30        | 0.196                   |
| <b>Alcohol</b>             | 0.028<br>(0.007)                                | < .001*    | 0.005<br>(0.007)  | .51        | 0.416                   | 0.017<br>(0.006)                               | .007*      | 0.015<br>(0.006)       | .01*       | 0.208                   |
| <b>Education</b>           | 0.026<br>(0.008)                                | .001*      |                   |            | 0.422                   | 0.016<br>(0.006)                               | .011*      |                        |            | 0.193                   |
| 10 years                   |                                                 |            |                   | .10        |                         |                                                |            |                        | .58        |                         |

|                                                       |                                |                |                                        |                |                               |                  |       |                                        |     |       |
|-------------------------------------------------------|--------------------------------|----------------|----------------------------------------|----------------|-------------------------------|------------------|-------|----------------------------------------|-----|-------|
| > 10 years                                            |                                |                | -0.484<br>(0.288)<br>-0.648<br>(0.288) | .03*           |                               |                  |       | -0.134<br>(0.240)<br>-0.180<br>(0.240) | .45 |       |
| <b>Mental health</b>                                  | 0.028<br>(0.007)               | < .001*        | -0.007<br>(0.009)                      | .44            | 0.416                         | 0.017<br>(0.006) | .008* | -0.005<br>(0.008)                      | .52 | 0.195 |
| <b>Physical activity</b>                              | 0.028<br>(0.008)               | < .001*        | 0.013<br>(0.182)                       | .94            | 0.415                         | 0.015<br>(0.006) | .02   | -0.233<br>(0.150)                      | .12 | 0.199 |
| <b>Full model</b>                                     | 0.022<br>(0.008)               | .005*          |                                        |                | 0.442                         | 0.013<br>(0.006) | .05   |                                        |     |       |
| Hypertension                                          |                                |                | 0.016<br>(0.180)                       | .93            |                               |                  |       | 0.135<br>(0.151)                       | .37 |       |
| Waist circumference                                   |                                |                | -0.016<br>(0.009)                      | .08            |                               |                  |       | -0.012<br>(0.007)                      | .11 |       |
| Triglycerides                                         |                                |                | 0.154<br>(0.120)                       | .20            |                               |                  |       | 0.069<br>(0.100)                       | .50 |       |
| Total cholesterol                                     |                                |                | 0.079<br>(0.299)                       | .79            |                               |                  |       | 0.110<br>(0.250)                       | .66 |       |
| LDL                                                   |                                |                | 0.087<br>(0.314)                       | .78            |                               |                  |       | -0.093<br>(0.263)                      | .72 |       |
| HDL                                                   |                                |                | -0.292<br>(0.435)                      | .50            |                               |                  |       | -0.298<br>(0.364)                      | .41 |       |
| Diabetes mellitus                                     |                                |                | 0.965<br>(0.291)                       | .002*          |                               |                  |       | 0.467<br>(0.244)                       | .06 |       |
| Smoking                                               |                                |                |                                        |                |                               |                  |       |                                        |     |       |
| Ex-smoking                                            |                                |                | -0.088<br>(0.171)                      | .61            |                               |                  |       | 0.189<br>(0.143)                       | .19 |       |
| Current smoking                                       |                                |                | -0.160<br>(0.233)                      | .49            |                               |                  |       | 0.151<br>(0.195)                       | .44 |       |
| Depression                                            |                                |                | 0.138<br>(0.187)                       | .46            |                               |                  |       | 0.078<br>(0.157)                       | .62 |       |
| Alcohol                                               |                                |                | 0.004<br>(0.007)                       | .59            |                               |                  |       | 0.012<br>(0.006)                       | .05 |       |
| Education                                             |                                |                |                                        |                |                               |                  |       |                                        |     |       |
| 10 years                                              |                                |                | -0.403<br>(0.288)                      | .16            |                               |                  |       | -0.104<br>(0.241)                      | .67 |       |
| > 10 years                                            |                                |                | -0.523<br>(0.295)                      | .08            |                               |                  |       | -0.135<br>(0.247)                      | .59 |       |
| Mental health                                         |                                |                | -0.004<br>(0.010)                      | .72            |                               |                  |       | -0.003<br>(0.008)                      | .74 |       |
| Physical activity                                     |                                |                | 0.014<br>(0.182)                       | .94            |                               |                  |       | -0.211<br>(0.153)                      | .17 |       |
| <b>(b) ODI regression models</b>                      |                                |                |                                        |                |                               |                  |       |                                        |     |       |
| <b>Periventricular frontal WMH volume<sup>a</sup></b> |                                |                |                                        |                |                               |                  |       |                                        |     |       |
|                                                       | <b>ODI</b>                     |                | <b>covariate</b>                       |                | <b>adjusted R<sup>2</sup></b> |                  |       |                                        |     |       |
|                                                       | <b><math>\beta</math> (se)</b> | <b>p-value</b> | <b><math>\beta</math> (se)</b>         | <b>p-value</b> |                               |                  |       |                                        |     |       |
| <b>OSA model</b>                                      | 0.038<br>(0.011)               | .001*          |                                        |                | 0.414                         |                  |       |                                        |     |       |
| <b>Hypertension</b>                                   | 0.038<br>(0.011)               | .001*          | 0.057<br>(0.174)                       | .74            | 0.413                         |                  |       |                                        |     |       |
| <b>Waist circumference</b>                            | 0.038<br>(0.012)               | .002*          | 0.001<br>(0.008)                       | .85            | 0.413                         |                  |       |                                        |     |       |
| <b>Triglycerides</b>                                  | 0.033<br>(0.011)               | .004*          | 0.229<br>(0.069)                       | .001*          | 0.429                         |                  |       |                                        |     |       |
| <b>Total cholesterol</b>                              | 0.038<br>(0.011)               | .001*          | 0.192<br>(0.076)                       | .01*           | 0.422                         |                  |       |                                        |     |       |
| <b>LDL</b>                                            | 0.037<br>(0.011)               | .002*          | 0.195<br>(0.088)                       | .03            | 0.420                         |                  |       |                                        |     |       |
| <b>HDL</b>                                            | 0.036<br>(0.011)               | .002*          | -0.348<br>(0.248)                      | .16            | 0.416                         |                  |       |                                        |     |       |
| <b>Diabetes mellitus</b>                              | 0.032<br>(0.011)               | .005*          | 0.997<br>(0.277)                       | < .001*        | 0.432                         |                  |       |                                        |     |       |
| <b>Smoking</b>                                        | 0.038<br>(0.011)               | .001*          |                                        |                | 0.412                         |                  |       |                                        |     |       |
| <b>Ex-smoking</b>                                     |                                |                | -0.080<br>(0.173)                      | .64            |                               |                  |       |                                        |     |       |
|                                                       |                                |                |                                        | .68            |                               |                  |       |                                        |     |       |

|                          |                  |       |                   |       |       |
|--------------------------|------------------|-------|-------------------|-------|-------|
| Current smoking          |                  |       | 0.093<br>(0.224)  |       |       |
| <b>Depression</b>        | 0.038<br>(0.011) | .001* | 0.210<br>(0.175)  | .23   | 0.415 |
| <b>Alcohol</b>           | 0.038<br>(0.011) | .001* | 0.004<br>(0.007)  | .59   | 0.413 |
| <b>Education</b>         | 0.036<br>(0.011) | .002* |                   |       | 0.419 |
| 10 years                 |                  |       | -0.462<br>(0.289) | .11   |       |
| > 10 years               |                  |       | -0.646<br>(0.289) | .03   |       |
| <b>Mental health</b>     | 0.038<br>(0.011) | .001* | -0.007<br>(0.009) | .44   | 0.414 |
| <b>Physical activity</b> | 0.038<br>(0.011) | .001* | 0.015<br>(0.182)  | .94   | 0.413 |
| <b>Full model</b>        | 0.030<br>(0.012) | .01*  |                   |       | 0.440 |
| Hypertension             |                  |       | 0.005<br>(0.180)  | .98   |       |
| Waist circumference      |                  |       | -0.015<br>(0.009) | .08   |       |
| Triglycerides            |                  |       | 0.166<br>(0.120)  | .17   |       |
| Total cholesterol        |                  |       | 0.077<br>(0.299)  | .80   |       |
| LDL                      |                  |       | 0.089<br>(0.315)  | .78   |       |
| HDL                      |                  |       | -0.293<br>(0.435) | .50   |       |
| Diabetes mellitus        |                  |       | 0.949<br>(0.292)  | .002* |       |
| Smoking                  |                  |       |                   |       |       |
| Ex-smoking               |                  |       | -0.063<br>(0.171) | .71   |       |
| Current smoking          |                  |       | -0.142<br>(0.233) | .54   |       |
| Depression               |                  |       | 0.153<br>(0.187)  | .42   |       |
| Alcohol                  |                  |       | 0.003<br>(0.007)  | .67   |       |
| Education                |                  |       |                   |       |       |
| 10 years                 |                  |       | -0.389<br>(0.289) | .18   |       |
| > 10 years               |                  |       | -0.525<br>(0.295) | .08   |       |
| Mental health            |                  |       | -0.003<br>(0.010) | .76   |       |
| Physical activity        |                  |       | 0.019<br>(0.183)  | .92   |       |
